# 1 **Up-Regulation of $\alpha$ CaMKII Impairs Cued Fear Extinction and NMDAR-** 2 **Dependent LTD in the Lateral Amygdala**

3

4 Shuming An<sup>a#</sup>, Jiayue Wang<sup>a#</sup>, Xuliang Zhang<sup>a#</sup>, Yanhong Duan<sup>a</sup>, Junyan Lv<sup>a</sup>, Dasheng Wang<sup>a</sup>,  
5 Huan Zhang<sup>a</sup>, Gal Richter-Levin<sup>b</sup>, Xiaohua Cao<sup>a\*</sup>

6 a Key Laboratory of Brain Functional Genomics, MOE & STCSM, East China Normal University, Shanghai 200062, China

7 b “Sagol” Department of Neurobiology, University of Haifa, Haifa 31905, Israel

8 # These authors contributed equally to this work.

9 \*Correspondence: xhcao@brain.ecnu.edu.cn

10 Running title:  $\alpha$ CaMKII up-regulation impairs fear extinction and LTD

11

## 12 **ABSTRACT**

13 Impaired fear extinction is one of the hallmark symptoms of post-traumatic stress disorder  
14 (PTSD). The roles of  $\alpha$ CaMKII have been not extensively studied in fear extinction and LTD.  
15 Here, we found PTSD susceptible mice exhibited significant up-regulation of  $\alpha$ CaMKII in the  
16 lateral amygdala (LA). Consistently, increasing  $\alpha$ CaMKII in LA profoundly not only caused  
17 PTSD-like symptoms such as impaired fear extinction and anxiety-like behaviors, but also  
18 attenuated NMDAR-dependent LTD at thalamo-LA synapses, reduced GluA1-Ser845/Ser831  
19 dephosphorylation and AMPAR internalization. Suppressing the elevated  $\alpha$ CaMKII to normal  
20 level could completely reverse both PTSD-like symptoms and the impairments in LTD, GluA1-  
21 Ser845/Ser831 dephosphorylation and AMPAR internalization. Intriguingly, deficits in AMPAR  
22 internalization and GluA1-Ser845/Ser831 dephosphorylation were detected not only after  
23 impaired fear extinction, but also after attenuated LTD Our results demonstrate for the first time  
24 GluA1-Ser845/Ser831 dephosphorylation and AMPAR internalization are molecular links  
25 between LTD and fear extinction, and suggest  $\alpha$ CaMKII may be a potential molecular  
26 determinant of PTSD.

27

## 1 INTRODUCTION

2 Although some progresses have been made in understanding the molecular and cellular  
3 mechanisms of post-traumatic stress disorder (PTSD) recently, effective treatment for PTSD is  
4 still lacking. Since impaired fear extinction is one of the core symptoms of PTSD (Michopoulos  
5 et al., 2014; Yehuda et al., 2015), and fear extinction is the basis for psychological exposure  
6 therapy (M. R. Milad & Quirk, 2012), a deeper understanding of the molecular and cellular  
7 substrates underlying fear extinction would have important implications for developing the more  
8 effective treatment for PTSD.

9 At the synaptic level, long-term depression (LTD) has been implicated in fear extinction  
10 (Bennett, Arnold, Hatton, & Lagopoulos, 2017). N-methyl-D-aspartate (NMDA) GluN2B  
11 receptor antagonist can abolish both LTD at thalamo-lateral amygdala (T-LA) synapses and fear  
12 extinction (Dalton, Wu, Wang, Floresco, & Phillips, 2012). Moreover, deletion of kinesin  
13 superfamily proteins (KIFs) 21B impairs both hippocampal LTD and contextual fear extinction  
14 (Morikawa, Tanaka, Cho, Yoshihara, & Hirokawa, 2018). Besides, aquaporin-4 deficiency  
15 facilitates both NMDAR-dependent hippocampal LTD and fear extinction (Wu et al., 2017).  
16 Optogenetic delivery of LTD conditioning to the auditory input to LA facilitates cued fear  
17 extinction (Nabavi et al., 2014). Taken together, these findings indicate that there may be a link  
18 between LTD and fear extinction. NMDAR-dependent  $\alpha$ -amino-3-hydroxy-5-methyl-4-  
19 isoxazolepropionic acid receptor (AMPA) internalization is involved in fear extinction (Bai,  
20 Zhou, Wu, & Dong, 2014; Dalton, Wang, Floresco, & Phillips, 2008; J. Kim et al., 2007; Lin,  
21 Mao, Su, & Gean, 2010). Notably, disruption of AMPAR internalization impairs fear extinction  
22 (Dalton et al., 2008; J. Kim et al., 2007). Conversely, the promotion of AMPAR internalization  
23 facilitates fear extinction (Bai et al., 2014; Lin et al., 2010). It has been well known that AMPAR  
24 internalization also participates in LTD (Brebner et al., 2005; Collingridge, Isaac, & Wang,  
25 2004). Thus, we wonder whether AMPAR internalization is a direct link between fear extinction  
26 and LTD.

27 At the molecular level, CaMKII is the major kinase mediating NMDAR-dependent synaptic  
28 plasticity, AMPAR trafficking and memory (Collingridge et al., 2004). In mammals, CaMKII  
29 has four isoforms,  $\alpha$ ,  $\beta$ ,  $\gamma$  and  $\delta$  (Colbran & Soderling, 1990; Hell, 2014), and the  $\alpha$  isoform is  
30 predominantly expressed in the forebrain (Kennedy, McGuinness, & Greengard, 1983). On the

1 one hand,  $\alpha$ CaMKII plays a crucial role in long-term potentiation (LTP) and memory formation  
2 (Kerchner & Nicoll, 2008; J. Lisman, Yasuda, & Raghavachari, 2012). On the other hand,  
3  $\alpha$ CaMKII is also required for NMDAR-dependent hippocampal LTD. For example, both  
4 CaMKII inhibitor and  $\alpha$ CaMKII knock out could block LTD in CA1 (Coultrap et al., 2014).  
5 Moreover,  $\alpha$ CaMKII is activated during LTD expression (J. Y. Delgado et al., 2007; Lu, Isozaki,  
6 Roche, & Nicoll, 2010). In  $\alpha$ CaMKII-F89G transgenic (TG) mice,  $\alpha$ CaMKII overexpression in  
7 the forebrain impairs LTD in anterior cingulate and medial prefrontal cortices, and disrupts  
8 behavioral flexibility (J. Ma et al., 2015; Wei et al., 2006). However, whether and how  $\alpha$ CaMKII  
9 in LA affect LTD at T-LA synapses and cued fear extinction are still unknown.

10 To better illuminate the mechanism of cued fear extinction, thereby understanding the  
11 mechanism of PTSD, using the behavioral profiling approach (Ardi, Albrecht, Richter-Levin,  
12 Saha, & Richter-Levin, 2016), we identified PTSD susceptible mice with cued fear extinction  
13 deficit and anxiety-like behaviors from the trauma-exposed mice. It is worth noting that  
14 increased  $\alpha$ CaMKII was detected in LA of PTSD susceptible mice. To determine whether  
15 increased  $\alpha$ CaMKII can cause PTSD-like symptoms, we employed an inducible and reversible  
16 chemical-genetic technique to temporally and spatially manipulate  $\alpha$ CaMKII level in the  
17 forebrain of  $\alpha$ CaMKII-F89G TG mice, as well as using adeno-associated viral (AAV) vectors to  
18 elevate  $\alpha$ CaMKII specifically in LA of C57BL/6J mice. Consistently, up-regulation of  $\alpha$ CaMKII  
19 induced PTSD-like symptoms including cued fear extinction deficit and anxiety-like behaviors,  
20 which could be reversed by suppressing elevated  $\alpha$ CaMKII to normal level. In addition, we  
21 prove that GluA1-Ser845/Ser831 dephosphorylation and AMPAR internalization are the links  
22 between cued fear extinction and NMDAR-dependent LTD at T-LA synapses.

23

## 1 RESULTS

### 2 PTSD susceptible mice exhibit increased $\alpha$ CaMKII and reduced AMPAR internalization in 3 LA.

4 PTSD susceptible individuals were identified in UWT-exposed group (23 male mice) and 4-  
5 CS/US-exposed group (23 male mice) by employing the behavioral profiling approach described  
6 in MATERIALS AND METHODS section. PTSD susceptible mice had persistently higher level  
7 of cued freeze responses through extinction trials (Fig. 1B, PS-UWT vs Control,  $F_{(4, 85)} = 6.33$ ,  $P$   
8  $< 0.001$ ; PS-4CS/US vs Control,  $F_{(4, 85)} = 4.70$ ,  $P < 0.01$ ), spent significantly less time in the  
9 center area of open field (OF) chamber (Fig. 1C, PS-UWT vs Control,  $P < 0.01$ ; PS-4CS/US vs  
10 Control,  $P < 0.001$ ), in the light zone of light/dark box (LD) test (Fig. 1D, PS-UWT vs Control,  $P$   
11  $< 0.01$ ; PS-4CS/US vs Control,  $P < 0.001$ ), and in the open arms of water zero maze (OM) test  
12 (Fig. 1E, PS-UWT vs Control,  $P < 0.001$ ; PS-4CS/US vs Control,  $P < 0.001$ ) compared with  
13 control mice. Behavioral profiling revealed that only 7 mice each group showed PTSD-like  
14 symptoms in 23 mice exposed to UWT or 23 mice exposed repeatedly to US/CS.

15 LA is a key brain region for fear extinction and anxiety-like behaviors (Erlich, Bush, &  
16 Ledoux, 2012; Forster, Novick, Scholl, & Watt, 2012; Grosso, Santoni, Manassero, Renna, &  
17 Sacchetti, 2018; Jacques et al., 2019; Jihye Kim et al., 2015; J. Kim et al., 2007; Krabbe,  
18 Gründemann, & Lüthi, 2018; Mahan & Ressler, 2012; Ressler, 2010; Schafe, Doyère, & LeDoux,  
19 2005). CaMKII has been shown to be important for memory extinction (Bevilaqua et al., 2006;  
20 Burgdorf et al., 2017; Szapiro, Vianna, McGaugh, Medina, & Izquierdo, 2003). Moreover,  
21 GluA1-Ser845/Ser831 dephosphorylation and AMPAR internalization contribute to fear  
22 extinction (Bai et al., 2014; Dalton et al., 2008; Hollis, Sevelinges, Grosse, Zanoletti, & Sandi,  
23 2016; J. Kim et al., 2007; S. Lee et al., 2013; Lin et al., 2010; Talukdar, Inoue, Yoshida, & Mori,  
24 2018). Thus, we investigated levels of CaMKII, GluA1-Ser845/Ser831 phosphorylation and  
25 synaptic GluA1/2 expression in LA of PTSD susceptible mice and found  $\alpha$ CaMKII and the  
26 phosphorylated (p)- $\alpha$ CaMKII at Thr286 (p- $\alpha$ CaMKII-Thr286) were significantly up-regulated in  
27 PTSD susceptible mice experienced either UWT or 4-CS/US exposure (Fig. 1FG, PS-UWT vs  
28 Control,  $\alpha$ CaMKII,  $P < 0.01$ , p- $\alpha$ CaMKII-Thr286,  $P < 0.05$ ; PS-4CS/US vs Control,  $\alpha$ CaMKII,  $P$   
29  $< 0.05$ , p- $\alpha$ CaMKII-Thr286,  $P < 0.05$ ). However, no significant difference was observed in  
30  $\beta$ CaMKII among the three groups (Fig. 1F, PS-UWT vs Control,  $P > 0.05$ ; PS-4CS/US vs

1 Control,  $P > 0.05$ ). In addition, PTSD susceptible mice had a significant higher synaptic  
2 expression levels in the synaptic GluA1/2 expression and phosphorylated GluA1-Ser845/Ser831  
3 (Fig. 1F, PS-UWT vs Control, GluA1:  $P < 0.01$ , GluA2:  $P < 0.01$ , GluA1-Ser831:  $P < 0.01$ ,  
4 GluA1-Ser845:  $P < 0.01$ ; PS-4CS/US vs Control, GluA1:  $P < 0.001$ , GluA2:  $P < 0.05$ , GluA1-  
5 Ser831:  $P < 0.01$ , GluA1-Ser845:  $P < 0.01$ ). Taken together, these results suggest that PTSD  
6 susceptible mice display the significantly higher level of  $\alpha$ CaMKII, the lower level of GluA1-  
7 Ser845/Ser831 dephosphorylation and AMPAR internalization in LA.

### 8 **Increasing $\alpha$ CaMKII in LA is sufficient to cause PTSD-like phenotypes in both $\alpha$ CaMKII- 9 F89G TG and AAV- $\alpha$ CaMKII mice**

10 To further investigate whether elevated  $\alpha$ CaMKII in LA cause PTSD-like phenotypes such  
11 as impaired fear extinction and anxiety-like behaviors, we temporally and spatially manipulated  
12  $\alpha$ CaMKII overexpression in  $\alpha$ CaMKII-F89G TG mice by employing an inducible and reversible  
13 chemical-genetic technique described in MATERIALS AND METHODS section. The higher  
14 level of  $\alpha$ CaMKII and normal morphology in LA were observed in TG mice (Supplemental  
15 information, Fig. S1).

16 Then, cued fear memory recall and cued fear extinction were measured after only 1-CS / US  
17 for cued fear conditioning (Fig. 2A). Given that forebrain  $\alpha$ CaMKII overexpression impairs fear  
18 memory retrieval in our previous study (Cao et al., 2008), to examine the effect of  $\alpha$ CaMKII  
19 overexpression on cued fear extinction in TG mice, we designed the “normal  $\alpha$ CaMKII level  
20 during cued fear memory retrieval but elevated  $\alpha$ CaMKII level during cued fear extinction  
21 period” paradigm by a single i.p. injection of NM-PP1 into both TG mice and WT littermates 15  
22 mins before the first recall test of cued fear memory (Fig. 2A). Under this paradigm, TG mice  
23 exhibited normal retrieval of cued fear memory in comparison to that of wild-type littermate (Fig.  
24 2B, TG + i.p. vs WT + i.p.,  $P > 0.05$ ). However, during cued fear extinction trials, as shown in  
25 Fig. 2B, a significant declining freezing behavior was observed in WT mice but not in TG mice  
26 (Fig. 2B, TG + i.p. vs WT + i.p.,  $F_{(3, 264)} = 10.73$ ,  $P < 0.001$ ). A *post hoc* analysis revealed that  
27 TG mice exhibited significantly higher level of freezing response to the CS in cued fear  
28 extinction trial 2, 3 and 4 (Fig. 2B, TG + i.p. vs WT + i.p.,  $P < 0.05$ ), suggesting that elevated  
29  $\alpha$ CaMKII may impair cued fear extinction. In addition, TG mice spent significantly less time  
30 (Fig. 2C-E, TG + i.p. vs WT + i.p.,  $P < 0.001$ ) in the center area of OF chamber (Fig. 2C), in the

1 light zone of LD test (Fig. 2D), and in the open arms of elevated plus maze (EPM) test (Fig. 2E)  
2 compared with WT mice. Together, it indicates that increased  $\alpha$ CaMKII in LA may cause PTSD-  
3 like phenotypes.

4 To further confirm whether PTSD-like phenotypes in TG mice are due to the  
5 overexpression of  $\alpha$ CaMKII-F89G protein, we then designed the “normal  $\alpha$ CaMKII level during  
6 both fear memory recall and extinction period” paradigm by i.p. injection of NM-PP1 15 min  
7 before recall test and oral (p.o.) administration throughout the entire fear extinction period (Fig.  
8 2B). Under this “normal  $\alpha$ CaMKII level during both fear memory recall and extinction period”  
9 paradigm, TG mice had similar freezing response with that in WT mice during cued extinction  
10 trials (Fig. 2B, TG + i.p. + o.p. vs WT + ip,  $P > 0.05$ ), suggesting impaired cued fear extinction  
11 was rescued by NM-PP1 treatment in TG mice. Moreover, NM-PP1 had no effect on cued fear  
12 extinction in WT mice (Fig. 2B, WT + i.p. + o.p. vs. WT + i.p.,  $P > 0.05$ ), excluding the  
13 possibility that the rescuing effects by NM-PP1 were due to ‘facilitating extinction’ effects. In  
14 addition, TG mice with NM-PP1 treatments spent comparable amounts of time (Fig. 2C-E, TG +  
15 i.p. + p.o. vs. WT + i.p.,  $P > 0.05$ ) in the center area of OF chamber (Fig. 2C), in the light box of  
16 LD test (Fig. 2D) and in EPM test (Fig. 2E) compared with WT mice. Furthermore, TG mice  
17 without any treatment exhibited normal locomotor activity, exploratory behavior and pain  
18 threshold (Supplemental information, Fig. S2). Taken all together, we conclude that increased  
19  $\alpha$ CaMKII indeed is sufficient to produce PTSD-like phenotypes including impaired fear  
20 extinction and anxiety-like behaviors.

21 To further examine whether increasing  $\alpha$ CaMKII specifically in LA is also sufficient to  
22 cause PTSD-like phenotypes, we bilaterally injected viral vectors AAV- $\alpha$ CaMKII (pAAV-TRE-  
23  $\alpha$ CaMKII-P2A-EGFP-CMV-rTA) into LA of C57BL/6J mice to overexpress  $\alpha$ CaMKII  
24 specifically in LA (Fig. 3A). As expected, both  $\alpha$ CaMKII and p- $\alpha$ CaMKII-Thr286 expression  
25 levels significantly increased in LA of AAV- $\alpha$ CaMKII mice (Fig. 3DE,  $\alpha$ CaMKII,  $P < 0.001$ ; p-  
26  $\alpha$ CaMKII-Thr286,  $P < 0.001$ ). 24 h after 1-CS/US pairing, we performed cued fear memory test.  
27 AAV- $\alpha$ CaMKII mice exhibited impairment of cued fear memory during recall test (Fig. 3C,  $P <$   
28 0.001), which is consistent our previous finding that  $\alpha$ CaMKII overexpression impairs the  
29 retrieval of fear memory (Cao et al., 2008). In addition, AAV- $\alpha$ CaMKII mice showed  
30 significantly impaired fear extinction (Fig. 3C, AAV- $\alpha$ CaMKII vs AAV-control,  $F_{(4, 81)} = 2.63$ ,  $P$



1 < 0.05). A post hoc analysis revealed that AAV- $\alpha$ CaMKII mice exhibited the significant higher  
2 freezing responses than AAV-control mice on the 4th extinction trial ( $P < 0.05$ ). In addition to  
3 deficits in cued fear extinction, AAV- $\alpha$ CaMKII mice showed anxiety-like behaviors (data not  
4 shown). These data suggest that elevated  $\alpha$ CaMKII expression specifically in LA is also  
5 sufficient to result in PTSD-like symptoms.

### 6 **Increasing $\alpha$ CaMKII in LA impairs AMPAR internalization and GluA1-Ser845/Ser831** 7 **dephosphorylation after cued fear extinction in both $\alpha$ CaMKII-F89G TG and AAV-** 8 **$\alpha$ CaMKII mice**

9 We quantified the expression of synaptic AMPAR composition subunits (GluA1/2) and  
10 GluA1-Ser845/Ser831 phosphorylation in LA before/after cued fear conditioning and extinction  
11 trials. After cued fear extinction trials, compared with cued fear conditioning trial, significant  
12 decreases in the GluA1/2 synaptic expression and GluA1-Ser845/Ser831 phosphorylation levels  
13 could be found only in WT mice (Fig. 2FG, WT + FC vs WT + Ext, GluA1:  $P < 0.001$ ; GluA2:  $P$   
14  $< 0.01$ ; pGluA1-Ser845:  $P < 0.05$ ; pGluA1-Ser831:  $P < 0.01$ ), but not in TG mice (TG + FC vs  
15 TG + Ext, GluA1/A2, pGluA1-Ser845/831:  $P > 0.05$ ). Furthermore, the GluA1/2 synaptic  
16 expression and phosphorylated GluA1-Ser845/Ser831 in TG mice were significantly higher than  
17 that in WT mice after cued fear extinction trials (Fig. 2FG, TG + Ext vs WT + Ext, GluA1/A2:  $P$   
18  $< 0.01$ ; pGluA1-Ser845/Ser831:  $P < 0.05$ ).

19 Moreover, consistent with the above western blotting data from  $\alpha$ CaMKII-F89G TG mice,  
20 synaptic GluA1/2 expression, phosphorylated GluA1-Ser845/Ser831 levels were significantly  
21 higher in LA of AAV- $\alpha$ CaMKII mice than that in AAV-control mice after cued fear extinction  
22 trials (Fig. 3DE, GluA1/2, pGluA1-Ser845/Ser831,  $P < 0.01$ ). Taken all together, these results  
23 indicate that increasing  $\alpha$ CaMKII specifically in LA disrupts GluA1-Ser845/Ser831  
24 dephosphorylation and AMPAR internalization, consequently may impair cued fear extinction in  
25 both  $\alpha$ CaMKII-F89G TG and AAV- $\alpha$ CaMKII mice.

### 26 **Increasing $\alpha$ CaMKII impairs NMDAR-dependent LTD at T-LA synapses and NM-PP1** 27 **can recover the impairments**

28 To investigate the cellular mechanism of impaired cued fear extinction, we measured the  
29 basal synaptic transmission and synaptic plasticity at T-LA synapses in TG mice. No significant  
30 difference was observed in input-output curves, synaptic and total GluA1/2 expression of LA

1 (Supplemental information, Fig. S3AB, TG vs WT,  $P > 0.05$ ), paired-pulse depression (PPD) and  
2 synapsin expression (Fig. S3CD, TG vs WT,  $P > 0.05$ ) in LA between TG and WT mice.  
3 Moreover, either tetanic or theta burst stimulations induced similar level of LTP at T-LA  
4 synapses (Fig. 4AB, TG vs WT,  $P > 0.05$ ). These results indicate that  $\alpha$ CaMKII overexpression  
5 does not affect basal synaptic transmission and LTP at T-LA synapses.

6 We then analyzed the effects of the  $\alpha$ CaMKII overexpression on LTD at T-LA synapses.  
7 1Hz-LTD in TG slices was significantly reduced (Fig. 4C, TG vs WT,  $P < 0.05$ ) compared to that  
8 of WT slices, which could be recovered by 0.5  $\mu$ M NM-PP1 (Fig. 4C, TG + NM-PP1 vs TG,  $P <$   
9 0.05), while 1Hz-LTD in WT slices was not affected (Fig. 4C, WT + NM-PP1 vs WT,  $P > 0.05$ ).  
10 Notably, LTD at the T-LA synapses could be blocked by application of APV (50  $\mu$ M) and NM-  
11 PP1 (0.5  $\mu$ M) (Fig. 4D, TG vs WT,  $P > 0.05$ ), suggesting the LTD at the T-LA synapses is  
12 NMDAR-dependent. Besides, 3Hz-LTD was blocked in TG slices (Fig. 4E; TG vs WT,  $P <$   
13 0.001), which could also be recovered by NM-PP1 (Fig. 4E, TG + NM-PP1 vs TG,  $P < 0.01$ ),  
14 while 3Hz-LTD in WT slices was not affected (Fig. 4E, WT + NM-PP1 vs WT,  $P > 0.05$ ).  
15 Likewise, TG mice exhibited deficits in the depotentiation at T-LA synapses (Fig. 4F, TG vs WT,  
16  $P < 0.01$ ). In summary, our results show that  $\alpha$ CaMKII overexpression impairs NMDAR-  
17 dependent LTD and depotentiation at T-LA synapses in TG mice.

### 18 **Increasing $\alpha$ CaMKII impairs AMPAR internalization and GluA1-Ser845/Ser831** 19 **dephosphorylation during NMDAR-dependent LTD and NM-PP1 can rescue the** 20 **impairments**

21 Besides the low-frequency stimulation (LFS), brief NMDA exposure can chemically induce  
22 NMDAR-dependent LTD (H. K. Lee, K. Kameyama, R. L. Huganir, & M. F. Bear, 1998). In TG  
23 slices, NMDA application (30  $\mu$ M, 3 min) could elicit a significantly weaker LTD at T-LA  
24 synapses than that in WT slices (Fig. 5A, TG + NMDA vs WT + NMDA,  $P < 0.01$ ). Furthermore,  
25 0.5  $\mu$ M NM-PP1 could rescue the reduced NMDA- induced LTD in TG slices to normal level  
26 (Fig. 5A, TG + NMDA + NM-PP1 vs WT + NMDA,  $P > 0.05$ ; TG + NMDA + NM-PP1 vs TG  
27 + NMDA,  $P < 0.01$ ), but had no detectable effects on NMDA-induced LTD in WT slices (Fig.  
28 5A, WT + NMDA + NM-PP1 vs WT + NMDA,  $P > 0.05$ ). These results suggest that increasing  
29  $\alpha$ CaMKII in LA attenuates NMDAR-dependent chem-LTD at T-LA synapses in TG mice.



1 NMDA-induced LTD could elicit more widespread depression of synapse strength and share  
2 the similar molecular mechanisms to LFS-LTD such as AMPAR internalization and GluA1-  
3 Ser845/Ser831 phosphorylation (Jary Y. Delgado et al., 2007; He, Lee, Song, Kanold, & Lee,  
4 2011; Kollen, Dutar, & Jouvenceau, 2008; H.-K. Lee, K. Kameyama, R. L. Huganir, & M. F.  
5 Bear, 1998). To investigate the molecular mechanisms underlying deficit in NMDAR-dependent  
6 LTD in TG mice, we examined the amount of some synaptic proteins after NMDA-induced LTD.  
7 NMDA application significantly decreased the GluA1/2 synaptic expression and GluA1-  
8 Ser845/Ser831 phosphorylation in WT slices (Fig. 5BC, WT+NMDA vs WT, GluA1, GluA2,  
9 pGluA1-Ser845:  $P < 0.01$ ; pGluA1-Ser831:  $P < 0.001$ ), but not in TG slice (Fig. 5BC,  
10 TG+NMDA vs TG, GluA1/A2, pGluA1-Ser845/831:  $P > 0.05$ ). Besides, the synaptic expression  
11 of GluA1/2 and GluA1-Ser845/Ser831 phosphorylation in LA of TG slices were significantly  
12 higher than that in LA of WT slices (Fig. 5BC, TG + NMDA vs WT + NMDA, GluA1:  $P < 0.05$ ;  
13 GluA2:  $P < 0.01$ ; pGluA1-Ser845/Ser831:  $P < 0.05$ ). Furthermore, NM-PP1 (0.5  $\mu$ M)  
14 successfully rescued the impairments of AMPAR internalization and GluA1-Ser845/Ser831  
15 dephosphorylation of LA in TG slices (Fig. 5BC, TG+NMDA+NM-PP1 vs TG, GluA1/A2,  
16 pGluA1-Ser845/831:  $P < 0.01$ ), with no effect on that of WT slices (Fig. 5BC,  
17 WT+NMDA+NM-PP1 vs WT+NMDA, GluA1/A2, pGluA1-Ser845/831:  $P > 0.05$ ). Collectively,  
18 it indicates that  $\alpha$ CaMKII overexpression leads to impairment of AMPARs internalization and  
19 dephosphorylation in LA, which consequently impairs NMDAR-dependent LTD at T-LA  
20 synapses.

### 21 **Increasing $\alpha$ CaMKII reduces protein phosphatase (PP) activity and enhances stargazin** 22 **expression during NMDAR-dependent LTD and NM-PP1 can recover the abnormalities**

23 Activation of protein phosphatase 1 (PP1) contributes to LTD formation (Isabelle M.  
24 Mansuy & Shirish Shenolikar, 2006; Mauna, Miyamae, Pulli, & Thiels, 2011). Moreover,  
25 stargazin can be dephosphorylated by PP1 to induce the clathrin-dependent AMPAR endocytosis  
26 during NMDAR-dependent LTD (Bats, Groc, & Choquet, 2007; Matsuda et al., 2013).  
27 Dephosphorylation of the Thr320 residue on the C-terminal domain of PP1 can enhance PP1  
28 activity during NMDAR-dependent LTD (Dohadwala et al., 1994; Goldberg et al., 1995).  
29 Therefore, we investigated PP1-Thr320 phosphorylation (pPP1-Thr320) and stargazin expression  
30 in LA fractions of WT and TG slices with NMDA treatment. With NMDA exposure, significant  
31 reductions of pPP1-Thr320 and stargazin expression of LA could be found only in WT (Fig. 5DE,

1 WT+NMDA vs WT, pPP1-Thr320:  $P < 0.01$ ; stargazin:  $P < 0.001$ ) but not in TG slices  
2 (TG+NMDA vs TG, pPP1-Thr320, stargazin:  $P > 0.05$ ). Moreover, the PP1-Thr320  
3 phosphorylation and stargazin expression in LA of TG slices were dramatically higher than that  
4 in WT slices (Fig. 5DE, TG + NMDA vs WT + NMDA, pPP1-Thr320, stargazin,  $P < 0.05$ ),  
5 suggesting that the PP1 activity and stargazin expression were abnormal in TG mice during  
6 NMDA-induced LTD. Furthermore, NM-PP1 could recover the abnormalities in PP1 activity  
7 and stargazin expression in LA of TG slices (Fig. 5DE, TG + NMDA + NM-PP1 vs TG, pPP1-  
8 Thr320:  $P < 0.01$ ; stargazin:  $P < 0.01$ ; TG + NMDA + NM-PP1 vs TG + NMDA, pPP1-Thr320:  
9  $P < 0.05$ , stargazin:  $P < 0.05$ ) but not affecting that of WT slices (Fig. 5DE, WT + NMDA +  
10 NM-PP1 vs WT + NMDA, pPP1-Thr320:  $P > 0.05$ ; stargazin:  $P > 0.05$ ).

11 Protein phosphatase 2A (PP2A) and calcineurin (PP2B) play important roles in LTD  
12 maintenance and induction (Pi & Lisman, 2008; Winder & Sweatt, 2001). A significant augment  
13 of PP2A/2B activity could be found in LA of WT slices (Fig. 5F, WT+NMDA vs WT, PP2A:  $P < 0.01$ ;  
14 PP2B:  $P < 0.001$ ), but not in LA of TG slices during LTD formation (Fig. 5F,  
15 TG+NMDA vs TG, PP2A, PP2B:  $P > 0.05$ ). Besides, PP2A/2B activity was dramatically lower  
16 in LA of TG slices than that of WT slices (Fig. 5F, TG + NMDA vs WT + NMDA, PP2A:  $P < 0.01$ ;  
17 PP2B:  $P < 0.001$ ), during NMDA-induced LTD. Furthermore, NM-PP1 (0.5  $\mu\text{M}$ ) could  
18 also recover PP2A/2B activity down-regulation in LA of TG slices (Fig. 5F, TG + NMDA +  
19 NM-PP1 vs TG, PP2A, PP2B:  $P < 0.001$ ; TG + NMDA + NM-PP1 vs TG + NMDA, PP2A,  
20 PP2B:  $P < 0.01$ ) without affecting that of WT slices (Fig. 5F, WT + NMDA + NM-PP1 vs WT +  
21 NMDA, PP2A, PP2B:  $P > 0.05$ ). Taken together, all these results suggest that  $\alpha\text{CaMKII}$   
22 overexpression can weaken PP1, PP2A/2B activity and increase stargazin expression in LA  
23 fractions during NMDAR-dependent LTD, which may be potential mechanisms of AMPAR  
24 internalization and NMDAR-dependent LTD impairments.

25

26

## 1 DISCUSSION

2 In the present study, we reveal that PTSD susceptible mice exhibits significant up-regulation  
3 of  $\alpha$ CaMKII, down-regulation of GluA1-Ser845/Ser831 dephosphorylation and AMPAR  
4 internalization in LA. Consistently, increasing  $\alpha$ CaMKII specifically in LA can cause PTSD-like  
5 phenotypes such as fear extinction deficit and anxiety-like behaviors, and impairs AMPAR  
6 internalization and dephosphorylation, NMDAR-dependent LTD and depotentiation at T-LA  
7 synapses. Furthermore, deficits in AMPAR internalization and dephosphorylation are observed  
8 not only after impaired cued fear extinction *in vivo*, but also after attenuated NMDA-induced  
9 LTD in TG slices *in vitro*. Additionally, the deficits in AMPAR internalization and  
10 dephosphorylation are due to down-regulation of PP1/2A, PP2B activity and increased stargazin  
11 in TG mice. Importantly, NM-PP1, a specific inhibitor of the exogenous  $\alpha$ CaMKII-F89G, could  
12 rescue the above deficits in  $\alpha$ CaMKII-F89G TG mice. These data suggest up-regulation of  
13  $\alpha$ CaMKII may weaken activity of PP1/2A and PP2B, increase stargazing, thereby impairing  
14 AMPAR internalization and dephosphorylation, which consequently impairs LTD and fear  
15 extinction.

### 16 $\alpha$ CaMKII and memory extinction

17 CaMKII has been shown to play an important role in the extinction of different memories.  
18 Pharmacological inhibition of CaMKII by KN-62 blocked the extinction of step-down passive  
19 avoidance performance (Bevilaqua et al., 2006; Szapiro et al., 2003). Similarly,  $\alpha/\beta$ CaMKII  
20 inhibitor KN93 significantly attenuated the extinction of cocaine conditioned place preference  
21 (Burgdorf et al., 2017). Furthermore, partial reduction of  $\alpha$ CaMKII function due to the T286A<sup>+/-</sup>  
22 mutation impaired the extinction of contextual fear and spatial memories (Kimura, Silva, &  
23 Ohno, 2008). On the contrary, reduction of  $\alpha$ CaMKII by phosphorylation at serine 331 in LA  
24 enhances cocaine memory extinction (Rich et al., 2016). Besides, increased activation of  
25 CaMKII $\alpha$  in the CPEB3-knockout hippocampus reduced the extinction of spatial memories  
26 (Berger-Sweeney, Zearfoss, & Richter, 2006; Huang, Chao, Tsai, Chung, & Huang, 2014). In  
27 our study, we found that mouse models of PTSD with cued fear extinction deficit exhibited  
28 significant up-regulation of  $\alpha$ CaMKII in LA. Furthermore, increasing  $\alpha$ CaMKII in LA can cause  
29 PTSD-like phenotypes including impaired cued fear extinction.

30

## 1 **The causal relationship between elevated $\alpha$ CaMKII and impaired LTD**

2 CaMKII is a major kinase mediating AMPAR trafficking and NMDAR-dependent synaptic  
3 plasticity (Collingridge et al., 2004). Specifically, CaMKII can phosphorylate AMPA receptors  
4 GluA1 subunits at Ser845/Ser831, which can promote the integration of new AMPA receptors at  
5 the postsynaptic density (Barria, Muller, Derkach, Griffith, & Soderling, 1997), further  
6 enhancing synaptic transmission. On the contrary, CaMKII has been found to interact with  
7 Arc/Arg3.1 gene product to weaken synapses by promoting AMPA internalization (Okuno et al.,  
8 2012). Recently, CaMKII has been also shown to phosphorylate GluA1 subunits at Ser567 site to  
9 promote P2X2-mediated AMPAR internalization and drive synaptic depression (Pougnnet et al.,  
10 2016). In our study, we found that PTSD susceptible mice with blocked fear extinction exhibited  
11 significantly higher  $\alpha$ CaMKII, lower GluA1-Ser845/Ser831 dephosphorylation and lower  
12 AMPA internalization in LA. To investigate whether elevated  $\alpha$ CaMKII led to PTSD-like  
13 symptoms including impaired fear extinction, changed NMDAR-dependent LTD, GluA1  
14 dephosphorylation and AMPA internalization in LA, we then up-regulated  $\alpha$ CaMKII expression  
15 in  $\alpha$ CaMKII-F89G TG and AAV- $\alpha$ CaMKII infected mice. We found that  $\alpha$ CaMKII  
16 overexpression in LA caused impairments in GluA1-Ser845/Ser831 dephosphorylation, AMPA  
17 internalization, NMDAR-dependent LTD at T-LA synapses and cued fear extinction in TG mice,  
18 which could be completely rescued by a specific inhibitor (NM-PP1) of exogenous  $\alpha$ CaMKII-  
19 F89G. These results suggest there is causality between up-regulated  $\alpha$ CaMKII and impaired  
20 GluA1-Ser845/Ser831 dephosphorylation, defective AMPA internalization, NMDAR-dependent  
21 LTD and cued fear extinction.

## 22 **The molecular links between LTD and fear extinction**

23 NMDAR mediates both LTD and fear extinction (Bai et al., 2014; Brebner et al., 2005;  
24 Dalton et al., 2008; Fox, Russell, Titterness, Wang, & Christie, 2007; Radulovic, Ren, & Gao,  
25 2019). It has been reported that a GluR2-derived peptide (Tat-GluR23Y) blocked AMPAR  
26 internalization and impaired NMDAR-dependent LTD both *in vitro* (Bai et al., 2014; Brebner et  
27 al., 2005; Dalton et al., 2008) and *in vivo* (Fox et al., 2007). Moreover, NMDA NR2B receptors  
28 antagonist (Ro25-6981) blocked AMPAR internalization and disrupted fear extinction (J. Kim et  
29 al., 2007). Conversely, systemic administration of d-serine enhanced both AMPAR  
30 internalization and fear extinction (Bai et al., 2014). In addition, GluA1-Ser845/Ser831

1 dephosphorylation also played important roles in NMDAR-dependent LTD (Diering, Heo,  
2 Hussain, Liu, & Huganir, 2016) and fear extinction (Hollis et al., 2016; Talukdar et al., 2018).  
3 Although the above findings indicate AMPAR internalization and dephosphorylation may be  
4 links between fear extinction and LTD, supporting evidence is still lacking. In our current study,  
5 deficits in GluA1-Ser845/Ser831 dephosphorylation and AMPAR internalization were observed  
6 not only after impaired cued fear extinction *in vivo*, but also after attenuated NMDA-induced  
7 LTD in  $\alpha$ CaMKII-F89G TG slices *in vitro*. Furthermore, a specific inhibitor of the exogenous  
8  $\alpha$ CaMKII-F89G (NM-PP1) could completely rescue the deficits in cued fear extinction, NMDA-  
9 induced LTD, GluA1-Ser845/Ser831 dephosphorylation and AMPAR internalization. Thus, our  
10 data demonstrate that deficits in Ser845/GluA1-Ser831 dephosphorylation and AMPAR  
11 internalization by elevated  $\alpha$ CaMKII are molecular links between impaired NMDAR dependent-  
12 LTD and fear extinction. In other words, we demonstrate for the first time that GluA1-  
13 Ser845/Ser831 dephosphorylation and AMPAR internalization are molecular links between  
14 NMDA dependent-LTD and fear extinction.

### 15 **How does excessive $\alpha$ CaMKII impair AMPAR internalization and dephosphorylation** 16 **during NMDAR-dependent LTD?**

17 LTD formation requires PPs (PP1, PP2A and PP2B) activation (Kameyama, Lee, Bear, &  
18 Huganir, 1998; H. K. Lee et al., 1998). Activated PPs dephosphorylate GluA1-Ser845/Ser831  
19 (Hu, Huang, Yang, & Xia, 2007; I. M. Mansuy & S. Shenolikar, 2006; Winder & Sweatt, 2001),  
20 which cause a reduction of open probability or conductance for AMPAR channels and finally  
21 contribute to LTD formation. Specifically, PP1 is activated through a  $\text{Ca}^{2+}$ -PP2B-I1 pathway and  
22 has a more predominant role in depressing potentiated synapses, whereas PP2A is activated  
23 through PP2B/PP1 cascade or pathways independent on PP2B and mainly depresses naive  
24 synapses (Winder & Sweatt, 2001). However, in  $\alpha$ CaMKII-F89G TG mice,  $\alpha$ CaMKII  
25 overexpression could exhibit higher potency in the competition with PP2B for  $\text{Ca}^{2+}$ /CaM, which  
26 might decrease the accessibility of PP2B to  $\text{Ca}^{2+}$ /CaM and inhibit the activity of the PP2B-I1-  
27 PP1 pathway, thereby inhibiting PP1 activity. In addition, high concentration of phosphorylated  
28  $\alpha$ CaMKII could saturate the dephosphorylation ability of PP1, and thereby weaken PP1  
29 dephosphorylating GluA1-Ser845 or GluA1-Ser831 (Hu et al., 2007; H. K. Lee, Barbarosie,  
30 Kameyama, Bear, & Huganir, 2000; J. E. Lisman & Zhabotinsky, 2001; I. M. Mansuy & S.

1 Shenolikar, 2006; Winder & Sweatt, 2001). Unlike PP1, PP2A can be directly inactivated by  
2 CaMKII through phosphorylating its B'  $\alpha$  subunits (Fukunaga et al., 2000; Pi & Lisman, 2008),  
3 so excessive CaMKII can weaken PP2A activity. Collectively, one explanation for impairment of  
4 NMDAR-dependent LTD is that the excessive  $\alpha$ CaMKII can lower activity of PPs, thereby  
5 reduce GluA1-Ser845/Ser831 dephosphorylation and AMPAR internalization, and consequently  
6 impair LTD.

7 It has been shown that stargazin can be dephosphorylated by PP1 through  $\text{Ca}^{2+}$ -PP2B-I1  
8 pathway and form a ternary complex with APs to promote AMPAR internalization during  
9 NMDAR-dependent LTD (Matsuda et al., 2013; Tomita et al., 2003). Conversely, stargazin can  
10 be directly phosphorylated by activated CaMKII and bind to PSD-95 to immobilize AMPARs at  
11 synapses, which contributes to LTP (Bats et al., 2007; Opazo et al., 2010). In  $\alpha$ CaMKII-F89G  
12 TG mice, more stargazin is expressed at the synaptic sites during NMDAR-dependent LTD.  
13 Therefore, another explanation for impairment of NMDAR-dependent LTD is that excessive  
14 CaMKII weakens AMPAR internalization through directly increasing stargazin phosphorylation  
15 and indirectly reducing stargazin dephosphorylation caused by lower PP1 activity, and finally  
16 impairs LTD.

## 17 **CONCLUSION**

18 We have found that PTSD-susceptible mice exhibit the higher  $\alpha$ CaMKII expression, and  
19 lower GluA1-Ser845/Ser831 dephosphorylation and AMPAR internalization in LA. Increasing  
20  $\alpha$ CaMKII leads to PTSD-like phenotypes such as impaired fear extinction and anxiety-like  
21 behaviors, and impairs LTD at T-LA synapses. Furthermore, diminished GluA1-Ser845/Ser831  
22 dephosphorylation and AMPAR internalization were observed not only after impaired fear  
23 extinction *in vivo*, but also after attenuated NMDA-induced LTD in TG slices *in vitro*. Further  
24 data suggest that the impairment of NMDAR-dependent LTD is caused by the defective PPs  
25 activity and the excessive synaptic stargazin in  $\alpha$ CaMKII-F89G TG mice. In summary,  $\alpha$ CaMKII  
26 may be identified as a powerful regulator of the core symptoms of PTSD and LTD at T-LA  
27 synapses, and may be a key molecular determinant of PTSD.

28

29



## 1 MATERIALS AND METHODS

### 2 Animals

#### 3 *Biochemical Characterizations of $\alpha$ CaMKII-F89G TG mice.*

4  $\alpha$ CaMKII-F89G TG mice were donated by Dr. Tsien's lab (Wang et al., 2003). Mutant  
5  $\alpha$ CaMKII-F89G was generated with silent mutation (i.e. replacing the Phe-89 with Gly in  
6  $\alpha$ CaMKII), so that the ATP-binding pocket of  $\alpha$ CaMKII-F89G kinase was enlarged. To  
7 selectively block exogenous  $\alpha$ CaMKII-F89G and leave endogenous  $\alpha$ CaMKII intact, NM-PP1  
8 was designed to fit only this enlarged pocket but not the unmodified pocket of native  $\alpha$ CaMKII.  
9 By using  $\alpha$ CaMKII promoter-driven construct, we were able to overexpress  $\alpha$ CaMKII-F89G in  
10 the forebrain neurons. The  $\alpha$ CaMKII-F89G could be rapidly and selectively manipulated in the  
11 mouse forebrain by intraperitoneal (i.p.) injection or noninvasive oral intake of 1-  
12 Naphthylmethyl (NM)-PP1. Specifically, a single i.p. injection of NM-PP1(16.57 ng/g) into  
13 freely behaving TG mice could completely suppress  $\alpha$ CaMKII-F89G in the forebrain regions of  
14 TG mice within 15 minutes and the complete suppression could be maintained for 40 min. The  
15 oral intake (5  $\mu$ M NM-PP1 in drinking water) could result in partial inhibition of  $\alpha$ CaMKII-  
16 F89G in the TG mice by 6 h (no inhibition for the initial 3 h) and complete inhibition by 24 h.  
17 Bath application of 0.5  $\mu$ M NM-PP1 in the slices of TG mice could inhibit  $\alpha$ CaMKII-F89G but  
18 had no effect on native  $\alpha$ CaMKII (Wang et al., 2003).

19 All experimental procedures were conducted according to Animals Act, 2006 (China) and  
20 approved by the Institutional Animal Care and Use Committee (IACUC approval ID #M09018)  
21 of the East China Normal University. All mice were male and 3-4 months old. C57BL/6J mice  
22 were used for Figure 1 and 3.  $\alpha$ CaMKII-F89G transgenic mice and wild-type littermates were  
23 used for the rest of Figures. The mice were housed in 12 h light/12 h dark cycle (lights on at 7  
24 a.m.) with free access to food and water.

### 25 Behavior experiments

#### 26 *Behavioral profiling for identification of PTSD susceptible mice*

27 We applied a behavioral profiling approach (Ardi et al., 2016) to identify PTSD susceptible  
28 mice in either underwater trauma (UWT)-exposed mice (G. Ritov, Boltyansky, & Richter-Levin,  
29 2016) or 4 conditioned stimulus /unconditioned stimulus (4-CS/US)-exposed mice (Borghans &  
30 Homberg, 2015; Dębiec, Bush, & LeDoux, 2011; Fenster, Lebois, Ressler, & Suh, 2018; Ji et al.,

1 2014a, 2014b; Mahan & Ressler, 2012; Mohammed R. Milad & Quirk, 2011; Radulovic et al.,  
2 2019).

3 In detail, the C57BL/6J mice were randomly divided into three groups: control group (n =  
4 12), UWT-exposed group (n = 23) and 4-CS/US-exposed group (n = 23).

5 The control mice without any treatment were kept in home cages for 4 weeks. The UWT-  
6 exposed mice were individually allowed to swim freely for 5 s in a water-filled plastic tank, then  
7 submerged under water for 35 s using a metal net, next kept in their home cages for 4 weeks  
8 (Ardi et al., 2016; G. Ritov et al., 2016).

9 The 4-CS/US-exposed mice were individually placed in the chamber and allowed to explore  
10 the environment freely for 2 min, and then exposed to the conditioned stimulus (CS: 75 dB  
11 sound at 2800 Hz) for 30 s. At the last 2 s of tone stimulus, the unconditioned stimulus (US: 0.50  
12 mA footshock, 2 s) was delivered. After 4-CS/US pairings with 2 min intertrial interval, mice  
13 were kept in the chamber for 2 min and then stayed in their home cages for 4 weeks.

14 Three groups were examined in the open field (OF) test, light/dark (LD) test, water zero  
15 maze (OM) test, fear conditioning and extinction experiments. The freezing behavior was  
16 monitored by Freeze Frame system (Coulbourn Instruments, USA).

17 We calculated six parameters: two parameters represent the level of locomotor activity and  
18 four parameters represent anxiety-like performances from the four experiments. To create the  
19 behavior profiles, firstly we referred to the performances of the control group as the behavior of  
20 the normal population and determined the distribution of values in the control group. Standard  
21 deviations were used to calculate the upper and lower “cut-off values” for each chosen parameter.  
22 Secondly, the performances of each mouse in the UWT-exposed group or 4-CS/US-exposed  
23 group were compared to the distribution curve of the control group. Each susceptible mouse  
24 must exhibit values that are under or above the lower and upper cut-off values in at least four out  
25 of the six parameters. “Cut-off values” of six parameters: the center time in the OF test,  $560.32 \pm$   
26  $34.25$  s; the time in the light box in the LD test,  $788.60 \pm 58.92$  s; the time in the open arms in  
27 the OM test,  $111.43 \pm 8.88$  s; the freezing percentage in the last day of cued fear extinction,  
28  $31.98\% \pm 3.91\%$ ; total distance in the OF test,  $7059.99 \pm 427.80$  cm; total distance in the LD test,  
29  $9124.67 \pm 220.50$  cm.

1 *Cued fear extinction*

2 4 weeks after 4-CS/US pairings or 24 h after the 1-CS/US pairing, each mouse was placed  
3 into a novel chamber and monitored for 2 min (in the absence of the tone). For the recall test, the  
4 cued freezing responses to a 3 min tone (75 dB sound at 2800 Hz) without footshock were  
5 measured. Then, 4 cued fear extinctions trials were conducted like the recall test in the next 4  
6 following days. Data were presented as the mean  $\pm$  s.e.m. Two-way ANOVA was used for  
7 statistical analysis.

8 *Open field*

9 As described previously (Yan et al., 2015), briefly, each mouse was placed in an acrylic  
10 open-field chamber (27 cm long  $\times$  27 cm wide  $\times$  38 cm high) for 30 min. The amount of moving  
11 distance, the time in the center area, and the number of rearing were measured using a Tru-scan  
12 DigBahv-locomotion Activity Video Analysis System (Coulbourn Instruments, USA). Data were  
13 presented as the mean  $\pm$  s.e.m. One-way ANOVA was used for statistical analysis in Fig. 1C, 2C  
14 and Student's t-test in Fig. S2A.

15 *Light/dark test*

16 The box (27 cm long  $\times$  27 cm wide  $\times$  38 cm high) was divided into two equal zones -  
17 light zone and dark zone. The light zone was painted white and illuminated by the white light  
18 while the dark zone was painted black and not illuminated. These two zones were connected by a  
19 door in the middle divider. Mice could shuttle freely between two boxes. The total distance and  
20 the time stayed in light zone were delineated by the Tru-scan DigBahv-locomotion Activity  
21 Video Analysis System (Coulbourn Instruments, USA) for 30 min. Data were presented as the  
22 mean  $\pm$  s.e.m. One-way ANOVA was used for statistical analysis in Fig. 1D and 2D.

23 *Water-associated zero maze task*

24 Experimental protocol and device were similar as described previously (Gilad Ritov &  
25 Richter-Levin, 2014). This device was composed of an annular platform and a plastic bucket. The  
26 annular platform was divided into four equal quadrants - two open arms and two closed arms.  
27 The plastic bucket was full of water for 40 cm deep. After 5 min habituation, mouse was put into  
28 one of the open arms facing the closed arm for 5 min. The time spent in the open arms and

1 closed arms were measured by Any-maze system (USA, Stoelting). Data were presented as the  
2 mean  $\pm$  s.e.m. One-way ANOVA was used for statistical analysis.

### 3 *Elevated plus maze test*

4 The apparatus consists of two opposed open arms (30 cm  $\times$  5 cm), two opposed closed arms  
5 (30 cm  $\times$  5 cm) and one open square (5 cm  $\times$  5 cm) in the center, which was elevated above the  
6 floor (50 cm). Each mouse was placed in the center of the plus maze with its face directing to an  
7 open arm and allowed to explore for 5 min. The time spent and moving distances in open and  
8 closed arms were automatically recorded by Any-maze system (USA, Stoelting). Data were  
9 presented as the mean  $\pm$  s.e.m. One-way ANOVA was used for statistical analysis.

### 10 **Animal surgery**

11 To elevate  $\alpha$ CaMKII specifically in LA of C57BL/6J mice, we injected pAAV-TRE-  
12  $\alpha$ CaMKII-P2A-EGFP-CMV-rTA (AAV- $\alpha$ CaMKII) or pAAV-TRE-P2A-EGFP-CMV-rTA  
13 (AAV-control) virus ( $2.45 \times 10^{-12}$  and  $2.38 \times 10^{-12}$  vector genomes/ml, respectively, Obio  
14 Technology, China) bilaterally into LA (AP, -1.60 mm; ML,  $\pm$ 3.35 mm; DV, -4.80 mm) of  
15 C57BL/6J mice. After the injection, mice were put back into home cages to recover for one  
16 month before experiments. AAV- $\alpha$ CaMKII mice were fed with doxycycline solution (1g/L in  
17 drinking water) to induce the virus expression throughout the behavior tests.

### 18 **Dendritic spine analysis**

19 Dendritic spine analysis were performed as previously described (Ming et al., 2018). Briefly,  
20 mice were deeply anaesthetized and transcardially perfused. 200  $\mu$ m coronal brain sections were  
21 cut and collected in 0.1 M PBS. LA neurons were loaded iontophoretically with a 5% Lucifer  
22 Yellow solution. Images of basal and apical dendrites of LA pyramidal neurons were scanned  
23 using a Leica SP2 confocal microscope at 63 $\times$  under oil immersion. The number of spines per  
24 micrometer along the dendritic longitudinal axis was counted as spine density. Data were  
25 presented as the mean  $\pm$  s.e.m. Student's t-test was used for statistical analysis.

### 26 **Sensitivity to foot shock**

27 This test was performed according to the methods as published (Duan, Zhou, Ma, Yin, &  
28 Cao, 2015). Mice were individually placed in the conditioning chamber to receive 1 s shocks of  
29 gradually increasing current intensity by an increment of 0.01 mA (flinching, 0.05-0.1 mA;

1 vocalization, 0.1-0.2 mA; jumping, 0.45-0.6 mA) with 20 s intervals. The minimum current  
2 required to elicit flinching, vocalization and jumping in mice were measured. Data were  
3 presented as the mean  $\pm$  s.e.m. Student's t-test was used for statistical analysis.

#### 4 **Amygdala slice electrophysiology**

5 Protocols were similar as described previously (J. Kim et al., 2007; T. F. Ma et al., 2013).  
6 Mice (3-4 months old) were anaesthetized with sodium pentobarbital and sacrificed by  
7 decapitation. Whole brain coronal slices (370  $\mu$ m thick for fEPSPs recording) containing the  
8 amygdala were cut using a vibroslicer (vibratome 3000) with the cold (4  $^{\circ}$ C) and oxygenated  
9 (95% O<sub>2</sub> /5% CO<sub>2</sub>) modified artificial cerebrospinal fluid (ACSF) containing (in mM): Choline  
10 chloride, 110; KCl, 2.5; CaCl<sub>2</sub>, 0.5; MgSO<sub>4</sub>, 7; NaHCO<sub>3</sub>, 25; NaH<sub>2</sub>PO<sub>4</sub>, 1.25; D-glucose, 25;  
11 pH 7.4. The slices were recovered in an incubation chamber with normal ACSF containing (in  
12 mM): NaCl, 119; CaCl<sub>2</sub>, 2.5; KCl, 2.5; MgSO<sub>4</sub>, 1.3; NaHCO<sub>3</sub>, 26.2; Na<sub>2</sub>HPO<sub>4</sub>, 1.0; D-glucose,  
13 11, pH 7.4; 95% O<sub>2</sub> and 5% CO<sub>2</sub> for 60 min at 31  $^{\circ}$ C, and then returned to room temperature for  
14 at least 1 h before recording.

#### 15 **Field excitatory postsynaptic potential recording**

16 A stimulating electrode was placed in the fibers from the internal capsule to activate the  
17 thalamic input to the lateral amygdala (T-LA) synapses. A recording electrode was positioned in  
18 LA to record field excitatory postsynaptic potential (fEPSP). Test responses were elicited at  
19 0.033 Hz. After obtaining a stable baseline response for at least 15 min, LTP or LTD was  
20 induced. LTP was induced by applying 2 trains high frequency stimulation (100 Hz for 1 s) with  
21 10 s interval or 3 trains theta burst stimulation (10 bursts delivered every 200 ms, each burst  
22 consisted of 4 pulses at 100 Hz) with 10 s interval. For LTD induction, the standard 1 Hz  
23 protocol (1 Hz for 15 min) and 3 Hz protocol (3 Hz for 5 min) were used. Depotentiation was  
24 induced by applying 2 trains of high frequency stimulation (100 Hz for 1s) with 10 s interval  
25 followed by the standard 1 Hz protocol (1 Hz for 15 min) after 20 min. For chemical-LTD  
26 induction, NMDA (Sigma, 30  $\mu$ M in ACSF) was infused into the slice chamber for 3 min. Data  
27 were presented as the mean  $\pm$  s.e.m. Student's t-test (for comparing two different groups with  
28 Gaussian distribution) and one-way ANOVA followed by HSD post-hoc test with Bonferroni's  
29 correction (for comparing more than two different groups) were used for statistical analysis.

30

## 1 **Proteins sample preparation**

2 Combined with the previous protocol (Cui et al., 2011; Yin et al., 2013), synaptosomes were  
3 prepared as follows. LA tissues were homogenized in 1.5 ml homogenate-buffer (320 mM  
4 sucrose, 5 mM HEPES, pH 7.4) containing freshly added PMSF, PIC and PIC3. Homogenates  
5 were centrifuged at 500 g for 5 min to yield insoluble components. Then the supernatant fraction  
6 was collected and centrifuged at 10,000 g for 10 min to yield precipitation. The precipitation  
7 pellet was resuspended in 2 ml of 0.32 M sucrose, layered onto 2.25 ml of 0.8 M sucrose, and  
8 centrifuged at 98,000 g for 15 min using a swinging bucket rotor. Synaptosomes were collected  
9 from the 0.8 M sucrose layer and concentrated by centrifugation at 20,800 g for 45 min. Then the  
10 precipitation was resuspended in synaptosome lysis buffer (30 mM Tris (pH 8.5), 5 mM  
11 magnesium acetate, 8 M Urea, and 4% W/V CHAPS). For total proteins preparation, the LA  
12 areas were homogenized with RIPA buffer containing freshly added PMSF, PIC and PIC3 and  
13 lysed on ice for 30 min, centrifuged at 10,000 g at 4 °C for 5 min, and total proteins were taken as  
14 supernatant. Then the protein samples were stored in a -80°C freezer until used. Protein samples  
15 were quantified us by a Pierce BCA Protein Assay kit (Thermo Scientific) after which protein  
16 was stored at -20°C.

## 17 **Western blot**

18 Each sample of protein (5 µg/lane) was separated by 10% SDS-PAGE (P40650, NCM Biotech)  
19 and separated at 120 V for 120 minutes. Then the separated proteins were transferred onto a  
20 polyvinylidene fluoride (PVDF) membrane. The PVDF membranes were blocked in blocking  
21 solution (5% skim milk and 1% BSA) at room temperature for 1h. A reversible Ponceau S  
22 staining of the membranes was done to normalize the relative amount of each protein on the  
23 membrane (just for synaptosomes). After washing with TBST buffer, the PVDF membranes  
24 were immunoblotted with following antibodies: GluA1 antibody (1:2,000, Santa Cruz), GluA2  
25 antibody (1:2,000, Millipore), pGluA1-Ser845 antibody (1:500, Abcam), pGluA1-Ser831  
26 antibody (1:500, Abcam), αCaMKII antibody (1:3,000, Abcam), p-αCaMKII-Thr286 antibody  
27 (1:20,000, Santa Cruz), βCaMKII antibody (1:2,000, Invitrogen), β-actin antibody (1:20,000,  
28 Sigma), GAPDH antibody (1:20,000, Proteintech), synapsin (SYP) antibody (1:2,000, Proteintech),  
29 TfR antibody (1:2,000, Abcam), Tubulin antibody (1:1,000, Millipore) at 4°C for 12h. After  
30 washing with TBST buffer, the blots were reacted with an HRP-conjugated secondary antibody



1 at room temperature for 1 hour. Band intensity on the blot was quantified by the ECL  
2 immunoblotting detection system (Bio-rad). Data were shown as mean  $\pm$  s.e.m.. Statistical  
3 differences were analyzed using post hoc test with Bonferroni's correction following one-way  
4 ANOVA.

#### 5 **PP2A activity measurement**

6 PP2A activity was measured by using immunoprecipitation phosphatase assay kit according  
7 to the manufacturer's instructions (Catalog # 17-313, Millipore). Statistical differences were  
8 analyzed using post hoc test with Bonferroni's correction following one-way ANOVA. Data  
9 were shown as mean  $\pm$  s.e.m.

#### 10 **PP2B activity measurement**

11 The activity of calcineurin (PP2B) was assayed by using a calcineurin cellular activity assay  
12 kit (207007, Millipore) by following the manufacturer's instructions. Statistical differences were  
13 analyzed using post hoc test with Bonferroni's correction following one-way ANOVA. Data  
14 were shown as mean  $\pm$  s.e.m.

#### 15 **Statistical analysis**

16 Statistical significance was assessed by one-way ANOVA, two-way ANOVA analysis of  
17 variance or two-tailed, unpaired and paired t-tests, where appropriate. Significant effects in  
18 analysis of variances were followed up with Bonferroni post-hoc tests. Results were considered  
19 significantly different when  $P < 0.05$ . All data were presented as means  $\pm$  s.e.m. The detail  
20 information about statistical analysis was provided in legends.

21

1 **ACKNOWLEDGMENTS**

2 We thank Dr. Xuechu Zhen and Dr. Liyong Li for their assistance with immunoblotting  
3 study, Dr. Kevan M. Shokat of UCSF for providing NM-PP1 inhibitor, and Dr. Bo Wang, Dr.  
4 Yihui Cui for their comments on the manuscript. This research was supported by fund from  
5 MOST China-Israel cooperation (No: 2016YFE0130500) and National Natural Science Fund of  
6 China (No: 31471077 and No: 31771177).

7 **AUTHOR CONTRIBUTIONS:**

8 S.A., J.W., X.Z., Y.D., J.L., D.W., H.Z., G.R.L., and X.C. designed the work; S.A., J.W.,  
9 X.Z., J.L. and D.W. performed the acquisition of data for the work. S.A., J.W, X.Z., and X.C.  
10 analyzed and interpreted data; S.A., J.W, X.Z., G.R.L., and X.C. wrote the manuscript.

11 **CONFLICT OF INTEREST**

12 The authors declare no conflict of interest.

13 **ADDITIONAL INFORMATION**

14 Supplementary information (Fig. S1, S2, S3A) accompanies this paper.

15

## 1 REFERENCES

- 2 Ardi, Z., Albrecht, A., Richter-Levin, A., Saha, R., & Richter-Levin, G. (2016). Behavioral  
3 profiling as a translational approach in an animal model of posttraumatic stress disorder.  
4 *Neurobiol Dis*, 88, 139-147. doi:10.1016/j.nbd.2016.01.012
- 5 Bai, Y., Zhou, L., Wu, X., & Dong, Z. (2014). d-Serine enhances fear extinction by increasing  
6 GluA2-containing AMPA receptor endocytosis. *Behavioural Brain Research*, 270, 223-  
7 227. doi:<https://doi.org/10.1016/j.bbr.2014.05.025>
- 8 Barria, A., Muller, D., Derkach, V., Griffith, L. C., & Soderling, T. R. (1997). Regulatory  
9 phosphorylation of AMPA-type glutamate receptors by CaM-KII during long-term  
10 potentiation. *Science*, 276(5321), 2042-2045. doi:DOI 10.1126/science.276.5321.2042
- 11 Bats, C., Groc, L., & Choquet, D. (2007). The Interaction between Stargazin and PSD-95  
12 Regulates AMPA Receptor Surface Trafficking. *Neuron*, 53(5), 719-734.  
13 doi:<https://doi.org/10.1016/j.neuron.2007.01.030>
- 14 Bennett, M. R., Arnold, J., Hatton, S. N., & Lagopoulos, J. (2017). Regulation of fear extinction  
15 by long-term depression: The roles of endocannabinoids and brain derived neurotrophic  
16 factor. *Behav Brain Res*, 319, 148-164. doi:10.1016/j.bbr.2016.11.029
- 17 Berger-Sweeney, J., Zearfoss, N., & Richter, J. (2006). Reduced extinction of hippocampal-  
18 dependent memories in CPEB knockout mice. *Learn Mem*, 13, 4-7.  
19 doi:10.1101/lm.73706
- 20 Bevilacqua, L. R., Bonini, J. S., Rossato, J. I., Izquierdo, L. A., Cammarota, M., & Izquierdo, I.  
21 (2006). The entorhinal cortex plays a role in extinction. *Neurobiol Learn Mem*, 85(2),  
22 192-197. doi:10.1016/j.nlm.2005.10.001
- 23 Borghans, B., & Homberg, J. R. (2015). Animal models for posttraumatic stress disorder: An  
24 overview of what is used in research. *World J Psychiatry*, 5(4), 387-396.  
25 doi:10.5498/wjp.v5.i4.387
- 26 Brebner, K., Wong, T. P., Liu, L., Liu, Y., Campsall, P., Gray, S., . . . Wang, Y. T. (2005).  
27 Nucleus accumbens long-term depression and the expression of behavioral sensitization.  
28 *Science*, 310(5752), 1340-1343. doi:10.1126/science.1116894
- 29 Burgdorf, C. E., Schierberl, K. C., Lee, A. S., Fischer, D. K., Van Kempen, T. A., Mudragel,  
30 V., . . . Rajadhyaksha, A. M. (2017). Extinction of Contextual Cocaine Memories  
31 Requires Ca(v)1.2 within D1R-Expressing Cells and Recruits Hippocampal Ca(v)1.2-

- 1           Dependent Signaling Mechanisms. *J Neurosci*, 37(49), 11894-11911.  
2           doi:10.1523/jneurosci.2397-17.2017
- 3   Cao, X., Wang, H., Mei, B., An, S., Yin, L., Wang, L. P., & Tsien, J. Z. (2008). Inducible and  
4           selective erasure of memories in the mouse brain via chemical-genetic manipulation.  
5           *Neuron*, 60(2), 353-366.
- 6   Colbran, R. J., & Soderling, T. R. (1990). Calcium/calmodulin-dependent protein kinase II. *Curr*  
7           *Top Cell Regul*, 31, 181-221.
- 8   Collingridge, G. L., Isaac, J. T., & Wang, Y. T. (2004). Receptor trafficking and synaptic  
9           plasticity. *Nat Rev Neurosci*, 5(12), 952-962. doi:10.1038/nrn1556
- 10   Coultrap, S. J., Freund, R. K., O'Leary, H., Sanderson, J. L., Roche, K. W., Dell'Acqua, M. L., &  
11           Bayer, K. U. (2014). Autonomous CaMKII Mediates Both LTP and LTD Using a  
12           Mechanism for Differential Substrate Site Selection. *Cell Reports*, 6(3), 431-437.  
13           doi:10.1016/j.celrep.2014.01.005
- 14   Cui, Y., Jin, J., Zhang, X., Xu, H., Yang, L., Du, D., . . . Cao, X. (2011). Forebrain NR2B  
15           overexpression facilitating the prefrontal cortex long-term potentiation and enhancing  
16           working memory function in mice. *PLoS One*, 6(5), e20312.  
17           doi:10.1371/journal.pone.0020312
- 18   Dalton, G. L., Wang, Y. T., Floresco, S. B., & Phillips, A. G. (2008). Disruption of AMPA  
19           receptor endocytosis impairs the extinction, but not acquisition of learned fear.  
20           *Neuropsychopharmacology : official publication of the American College of*  
21           *Neuropsychopharmacology*, 33(10), 2416-2426. doi:10.1038/sj.npp.1301642
- 22   Dalton, G. L., Wu, D. C., Wang, Y. T., Floresco, S. B., & Phillips, A. G. (2012). NMDA  
23           GluN2A and GluN2B receptors play separate roles in the induction of LTP and LTD in  
24           the amygdala and in the acquisition and extinction of conditioned fear.  
25           *Neuropharmacology*, 62(2), 797-806. doi:10.1016/j.neuropharm.2011.09.001
- 26   Dębiec, J., Bush, D. E., & LeDoux, J. E. (2011). Noradrenergic enhancement of reconsolidation  
27           in the amygdala impairs extinction of conditioned fear in rats--a possible mechanism for  
28           the persistence of traumatic memories in PTSD. *Depress Anxiety*, 28(3), 186-193.  
29           doi:10.1002/da.20803
- 30   Delgado, J. Y., Coba, M., Anderson, C. N., Thompson, K. R., Gray, E. E., Heusner, C. L., . . .  
31           O'Dell, T. J. (2007). NMDA receptor activation dephosphorylates AMPA receptor

- 1 glutamate receptor 1 subunits at threonine 840. *J Neurosci*, 27(48), 13210-13221.  
2 doi:10.1523/JNEUROSCI.3056-07.2007
- 3 Delgado, J. Y., Coba, M., Anderson, C. N. G., Thompson, K. R., Gray, E. E., Heusner, C. L., . . .  
4 O'Dell, T. J. (2007). NMDA Receptor Activation Dephosphorylates AMPA Receptor  
5 Glutamate Receptor 1 Subunits at Threonine 840. *The Journal of Neuroscience*, 27,  
6 13210-13221.
- 7 Diering, G. H., Heo, S., Hussain, N. K., Liu, B., & Huganir, R. L. (2016). Extensive  
8 phosphorylation of AMPA receptors in neurons. *Proceedings of the National Academy of*  
9 *Sciences*, 113(33), E4920. doi:10.1073/pnas.1610631113
- 10 Dohadwala, M., da Cruz e Silva, E. F., Hall, F. L., Williams, R. T., Carbonaro-Hall, D. A., Nairn,  
11 A. C., . . . Berndt, N. (1994). Phosphorylation and inactivation of protein phosphatase 1  
12 by cyclin-dependent kinases. *Proc Natl Acad Sci U S A*, 91(14), 6408-6412.
- 13 Duan, Y., Zhou, S., Ma, J., Yin, P., & Cao, X. (2015). Forebrain NR2B overexpression  
14 enhancing fear acquisition and long-term potentiation in the lateral amygdala. *Eur J*  
15 *Neurosci*, 42(5), 2214-2223. doi:10.1111/ejn.13008
- 16 Erlich, J. C., Bush, D. E. A., & Ledoux, J. E. (2012). The role of the lateral amygdala in the  
17 retrieval and maintenance of fear-memories formed by repeated probabilistic  
18 reinforcement. *Frontiers in behavioral neuroscience*, 6, 16-16.  
19 doi:10.3389/fnbeh.2012.00016
- 20 Fenster, R. J., Lebois, L. A. M., Ressler, K. J., & Suh, J. (2018). Brain circuit dysfunction in  
21 post-traumatic stress disorder: from mouse to man. *Nat Rev Neurosci*, 19(9), 535-551.  
22 doi:10.1038/s41583-018-0039-7
- 23 Forster, G. L., Novick, A. M., Scholl, J. L., & Watt, M. J. (2012). The Role of the Amygdala in  
24 Anxiety Disorders *The Amygdala - A Discrete Multitasking Manager*.
- 25 Fox, C. J., Russell, K., Titterness, A. K., Wang, Y. T., & Christie, B. R. (2007). Tyrosine  
26 phosphorylation of the GluR2 subunit is required for long-term depression of synaptic  
27 efficacy in young animals in vivo. *Hippocampus*, 17(8), 600-605.  
28 doi:10.1002/hipo.20302
- 29 Fukunaga, K., Muller, D., Ohmitsu, M., Bak ó E., DePaoli-Roach, A. A., & Miyamoto, E. (2000).  
30 Decreased Protein Phosphatase 2A Activity in Hippocampal Long-Term Potentiation.  
31 *Journal of Neurochemistry*, 74(2), 807-817. doi:10.1046/j.1471-4159.2000.740807.x

- 1 Goldberg, J., Huang, H. B., Kwon, Y. G., Greengard, P., Nairn, A. C., & Kuriyan, J. (1995).  
2 Three-dimensional structure of the catalytic subunit of protein serine/threonine  
3 phosphatase-1. *Nature*, 376(6543), 745-753. doi:10.1038/376745a0
- 4 Grosso, A., Santoni, G., Manassero, E., Renna, A., & Sacchetti, B. (2018). A neuronal basis for  
5 fear discrimination in the lateral amygdala. *Nat Commun*, 9(1), 1214.  
6 doi:10.1038/s41467-018-03682-2
- 7 He, K., Lee, A., Song, L., Kanold, P. O., & Lee, H. K. (2011). AMPA receptor subunit GluR1  
8 (GluA1) serine-845 site is involved in synaptic depression but not in spine shrinkage  
9 associated with chemical long-term depression. *J Neurophysiol*, 105(4), 1897-1907.  
10 doi:10.1152/jn.00913.2010
- 11 Hell, J. W. (2014). CaMKII: claiming center stage in postsynaptic function and organization.  
12 *Neuron*, 81(2), 249-265. doi:10.1016/j.neuron.2013.12.024
- 13 Hollis, F., Sevelinges, Y., Grosse, J., Zanoletti, O., & Sandi, C. (2016). Involvement of CRFR1  
14 in the Basolateral Amygdala in the Immediate Fear Extinction Deficit. *Eneuro*, 3(5).  
15 doi:10.1523/Eneuro.0084-16.2016
- 16 Hu, X.-d., Huang, Q., Yang, X., & Xia, H. (2007). Differential Regulation of AMPA Receptor  
17 Trafficking by Neurabin-Targeted Synaptic Protein Phosphatase-1 in Synaptic  
18 Transmission and Long-Term Depression in Hippocampus. *The Journal of Neuroscience*,  
19 27(17), 4674. doi:10.1523/JNEUROSCI.5365-06.2007
- 20 Huang, W. H., Chao, H. W., Tsai, L. Y., Chung, M. H., & Huang, Y. S. (2014). Elevated  
21 activation of CaMKII $\alpha$  in the CPEB3-knockout hippocampus impairs a specific form of  
22 NMDAR-dependent synaptic depotentiation. *Front Cell Neurosci*, 8, 367.  
23 doi:10.3389/fncel.2014.00367
- 24 Jacques, A., Chaaya, N., Hettiarachchi, C., Carmody, M.-L., Beecher, K., Belmer, A., . . .  
25 Johnson, L. R. (2019). Microtopography of fear memory consolidation and extinction  
26 retrieval within prefrontal cortex and amygdala. *Psychopharmacology*, 236(1), 383-397.  
27 doi:10.1007/s00213-018-5068-4
- 28 Ji, M. H., Jia, M., Zhang, M. Q., Liu, W. X., Xie, Z. C., Wang, Z. Y., & Yang, J. J. (2014a).  
29 Dexmedetomidine alleviates anxiety-like behaviors and cognitive impairments in a rat  
30 model of post-traumatic stress disorder. *Progress in Neuro-Psychopharmacology &*  
31 *Biological Psychiatry*, 54, 284-288. doi:10.1016/j.pnpbp.2014.06.013



- 1 Ji, M. H., Jia, M., Zhang, M. Q., Liu, W. X., Xie, Z. C., Wang, Z. Y., & Yang, J. J. (2014b).  
2 Dexmedetomidine alleviates anxiety-like behaviors and cognitive impairments in a rat  
3 model of post-traumatic stress disorder. *Prog Neuropsychopharmacol Biol Psychiatry*, *54*,  
4 284-288. doi:10.1016/j.pnpbp.2014.06.013
- 5 Kameyama, K., Lee, H. K., Bear, M. F., & Huganir, R. L. (1998). Involvement of a postsynaptic  
6 protein kinase A substrate in the expression of homosynaptic long-term depression.  
7 *Neuron*, *21*(5), 1163-1175.
- 8 Kennedy, M. B., McGuinness, T., & Greengard, P. (1983). A calcium/calmodulin-dependent  
9 protein kinase from mammalian brain that phosphorylates Synapsin I: partial purification  
10 and characterization. *J Neurosci*, *3*(4), 818-831.
- 11 Kerchner, G. A., & Nicoll, R. A. (2008). Silent synapses and the emergence of a postsynaptic  
12 mechanism for LTP. *Nat Rev Neurosci*, *9*(11), 813-825. doi:10.1038/nrn2501
- 13 Kim, J., An, B., Kim, J., Park, S., Park, S., Hong, I., . . . Choi, S. (2015). mGluR2/3 in the  
14 Lateral Amygdala is Required for Fear Extinction: Cortical Input Synapses onto the  
15 Lateral Amygdala as a Target Site of the mGluR2/3 Action. *Neuropsychopharmacology :  
16 official publication of the American College of Neuropsychopharmacology*, *40*(13), 2916-  
17 2928. doi:10.1038/npp.2015.145
- 18 Kim, J., Lee, S., Park, K., Hong, I., Song, B., Son, G., . . . Choi, S. (2007). Amygdala  
19 depotentiation and fear extinction. *Proc Natl Acad Sci U S A*, *104*(52), 20955-20960.  
20 doi:10.1073/pnas.0710548105
- 21 Kimura, R., Silva, A. J., & Ohno, M. (2008). Autophosphorylation of alphaCaMKII is  
22 differentially involved in new learning and unlearning mechanisms of memory extinction.  
23 *Learn Mem*, *15*(11), 837-843. doi:10.1101/lm.1049608
- 24 Kollen, M., Dutar, P., & Jouvenceau, A. (2008). The magnitude of hippocampal long term  
25 depression depends on the synaptic location of activated NR2-containing N-methyl-D-  
26 aspartate receptors. *Neuroscience*, *154*(4), 1308-1317.  
27 doi:10.1016/j.neuroscience.2008.04.045
- 28 Krabbe, S., Gründemann, J., & Lüthi, A. (2018). Amygdala Inhibitory Circuits Regulate  
29 Associative Fear Conditioning. *Biological Psychiatry*, *83*(10), 800-809.  
30 doi:<https://doi.org/10.1016/j.biopsych.2017.10.006>

- 1 Lee, H.-K., Kameyama, K., Huganir, R. L., & Bear, M. F. (1998). NMDA Induces Long-Term  
2 Synaptic Depression and Dephosphorylation of the GluR1 Subunit of AMPA Receptors  
3 in Hippocampus. *Neuron*, *21*(5), 1151-1162. doi:[https://doi.org/10.1016/S0896-](https://doi.org/10.1016/S0896-6273(00)80632-7)  
4 [6273\(00\)80632-7](https://doi.org/10.1016/S0896-6273(00)80632-7)
- 5 Lee, H. K., Barbarosie, M., Kameyama, K., Bear, M. F., & Huganir, R. L. (2000). Regulation of  
6 distinct AMPA receptor phosphorylation sites during bidirectional synaptic plasticity.  
7 *Nature*, *405*(6789), 955-959. doi:10.1038/35016089
- 8 Lee, H. K., Kameyama, K., Huganir, R. L., & Bear, M. F. (1998). NMDA induces long-term  
9 synaptic depression and dephosphorylation of the GluR1 subunit of AMPA receptors in  
10 hippocampus. *Neuron*, *21*(5), 1151-1162.
- 11 Lee, S., Song, B., Kim, J., Park, K., Hong, I., An, B., . . . Choi, S. (2013). GluA1  
12 phosphorylation at serine 831 in the lateral amygdala is required for fear renewal. *Nature*  
13 *Neuroscience*, *16*, 1436. doi:10.1038/nn.3491  
14 <https://www.nature.com/articles/nn.3491#supplementary-information>
- 15 Lin, H. C., Mao, S. C., Su, C. L., & Gean, P. W. (2010). Alterations of excitatory transmission in  
16 the lateral amygdala during expression and extinction of fear memory. *Int J*  
17 *Neuropsychopharmacol*, *13*(3), 335-345. doi:10.1017/S1461145709990678
- 18 Lisman, J., Yasuda, R., & Raghavachari, S. (2012). Mechanisms of CaMKII action in long-term  
19 potentiation. *Nature reviews. Neuroscience*, *13*(3), 169-182. doi:10.1038/nrn3192
- 20 Lisman, J. E., & Zhabotinsky, A. M. (2001). A model of synaptic memory: A CaMKII/PP1  
21 switch that potentiates transmission by organizing an AMPA receptor anchoring  
22 assembly. *Neuron*, *31*(2), 191-201. doi:Doi 10.1016/S0896-6273(01)00364-6
- 23 Lu, W., Isozaki, K., Roche, K. W., & Nicoll, R. A. (2010). Synaptic targeting of AMPA  
24 receptors is regulated by a CaMKII site in the first intracellular loop of GluA1.  
25 *Proceedings of the National Academy of Sciences of the United States of America*,  
26 *107*(51), 22266-22271. doi:10.1073/pnas.1016289107
- 27 Ma, J., Duan, Y., Qin, Z., Wang, J., Liu, W., Xu, M., . . . Cao, X. (2015). Overexpression of  
28  $\alpha$ CaMKII impairs behavioral flexibility and NMDAR-dependent long-term depression in  
29 the medial prefrontal cortex. *Neuroscience*, *310*, 528-540.  
30 doi:<https://doi.org/10.1016/j.neuroscience.2015.09.051>

- 1 Ma, T. F., Zhou, L., Wang, Y., Qin, S. J., Zhang, Y., Hu, B., . . . Gu, S. L. (2013). A selective  
2 M1 and M3 receptor antagonist, penehyclidine hydrochloride, prevents postischemic LTP:  
3 involvement of NMDA receptors. *Synapse*, 67(12), 865-874. doi:10.1002/syn.21693
- 4 Mahan, A. L., & Ressler, K. J. (2012). Fear conditioning, synaptic plasticity and the amygdala:  
5 implications for posttraumatic stress disorder. *Trends in Neurosciences*, 35(1), 24-35.  
6 doi:10.1016/j.tins.2011.06.007
- 7 Mansuy, I. M., & Shenolikar, S. (2006). Protein serine/threonine phosphatases in neuronal  
8 plasticity and disorders of learning and memory. *Trends Neurosci*, 29(12), 679-686.  
9 doi:10.1016/j.tins.2006.10.004
- 10 Mansuy, I. M., & Shenolikar, S. (2006). Protein serine/threonine phosphatases in neuronal  
11 plasticity and disorders of learning and memory. *Trends in Neurosciences*, 29(12), 679-  
12 686. doi:<https://doi.org/10.1016/j.tins.2006.10.004>
- 13 Matsuda, S., Kakegawa, W., Budisantoso, T., Nomura, T., Kohda, K., & Yuzaki, M. (2013).  
14 Stargazin regulates AMPA receptor trafficking through adaptor protein complexes during  
15 long-term depression. *Nature Communications*, 4, 2759. doi:10.1038/ncomms3759
- 16 <https://www.nature.com/articles/ncomms3759#supplementary-information>
- 17 Mauna, J. C., Miyamae, T., Pulli, B., & Thiels, E. (2011). Protein phosphatases 1 and 2A are  
18 both required for long-term depression and associated dephosphorylation of cAMP  
19 response element binding protein in hippocampal area CA1 in vivo. *Hippocampus*,  
20 21(10), 1093-1104. doi:10.1002/hipo.20823
- 21 Michopoulos, V., Rothbaum, A. O., Jovanovic, T., Almlil, L. M., Bradley, B., Rothbaum, B.  
22 O., . . . Ressler, K. J. (2014). Association of CRP Genetic Variation and CRP Level With  
23 Elevated PTSD Symptoms and Physiological Responses in a Civilian Population With  
24 High Levels of Trauma. *American Journal of Psychiatry*, 172(4), 353-362.  
25 doi:10.1176/appi.ajp.2014.14020263
- 26 Milad, M. R., & Quirk, G. J. (2011). Fear Extinction as a Model for Translational Neuroscience:  
27 Ten Years of Progress. *Annual Review of Psychology*, 63(1), 129-151.  
28 doi:10.1146/annurev.psych.121208.131631
- 29 Milad, M. R., & Quirk, G. J. (2012). Fear Extinction as a Model for Translational Neuroscience:  
30 Ten Years of Progress. *Annual Review of Psychology*, Vol 63, 63, 129-151.  
31 doi:10.1146/annurev.psych.121208.131631

- 1 Ming, C., Shao, D., Fu, Y., Ma, Q., Cui, D., Song, J., . . . Zheng, P. (2018). Key determinants for  
2 morphine withdrawal conditioned context-induced increase in Arc expression in anterior  
3 cingulate cortex and withdrawal memory retrieval. *Experimental Neurology*, 311.  
4 doi:10.1016/j.expneurol.2018.10.009
- 5 Morikawa, M., Tanaka, Y., Cho, H. S., Yoshihara, M., & Hirokawa, N. (2018). The Molecular  
6 Motor KIF21B Mediates Synaptic Plasticity and Fear Extinction by Terminating Rac1  
7 Activation. *Cell Rep*, 23(13), 3864-3877. doi:10.1016/j.celrep.2018.05.089
- 8 Nabavi, S., Fox, R., Proulx, C. D., Lin, J. Y., Tsien, R. Y., & Malinow, R. (2014). Engineering a  
9 memory with LTD and LTP. *Nature*, 511(7509), 348-352. doi:10.1038/nature13294
- 10 Okuno, H., Akashi, K., Ishii, Y., Yagishita-Kyo, N., Suzuki, K., Nonaka, M., . . . Bito, H. (2012).  
11 Inverse Synaptic Tagging of Inactive Synapses via Dynamic Interaction of Arc/Arg3.1  
12 with CaMKII $\beta$ . *Cell*, 149(4), 886-898. doi:10.1016/j.cell.2012.02.062
- 13 Opazo, P., Labrecque, S., Tigaret, C. M., Frouin, A., Wiseman, P. W., De Koninck, P., &  
14 Choquet, D. (2010). CaMKII Triggers the Diffusional Trapping of Surface AMPARs  
15 through Phosphorylation of Stargazin. *Neuron*, 67(2), 239-252.  
16 doi:<https://doi.org/10.1016/j.neuron.2010.06.007>
- 17 Pi, H. J., & Lisman, J. E. (2008). Coupled Phosphatase and Kinase Switches Produce the  
18 Tristability Required for Long-Term Potentiation and Long-Term Depression. *The*  
19 *Journal of Neuroscience*, 28(49), 13132. doi:10.1523/JNEUROSCI.2348-08.2008
- 20 Pougnet, J.-T., Compans, B., Martinez, A., Choquet, D., Hosy, E., & Boué-Grabot, E. (2016).  
21 P2X-mediated AMPA receptor internalization and synaptic depression is controlled by  
22 two CaMKII phosphorylation sites on GluA1 in hippocampal neurons. *Scientific reports*,  
23 6, 31836-31836. doi:10.1038/srep31836
- 24 Radulovic, J., Ren, L. Y., & Gao, C. (2019). N-Methyl D-aspartate receptor subunit signaling in  
25 fear extinction. *Psychopharmacology (Berl)*, 236(1), 239-250. doi:10.1007/s00213-018-  
26 5022-5
- 27 Ressler, K. J. (2010). Amygdala activity, fear, and anxiety: modulation by stress. *Biological*  
28 *Psychiatry*, 67(12), 1117-1119. doi:10.1016/j.biopsych.2010.04.027
- 29 Rich, M. T., Abbott, T. B., Chung, L., Gulcicek, E. E., Stone, K. L., Colangelo, C. M., . . .  
30 Torregrossa, M. M. (2016). Phosphoproteomic Analysis Reveals a Novel Mechanism of

- 1 CaMKII $\alpha$  Regulation Inversely Induced by Cocaine Memory Extinction versus  
2 Reconsolidation. *J Neurosci*, 36(29), 7613-7627. doi:10.1523/jneurosci.1108-16.2016
- 3 Ritov, G., Boltyansky, B., & Richter-Levin, G. (2016). A novel approach to PTSD modeling in  
4 rats reveals alternating patterns of limbic activity in different types of stress reaction.  
5 *Molecular Psychiatry*, 21(5), 630-641. doi:10.1038/mp.2015.169
- 6 Ritov, G., & Richter-Levin, G. (2014). Water associated zero maze: a novel rat test for long term  
7 traumatic re-experiencing. *Frontiers in behavioral neuroscience*, 8, 1-1.  
8 doi:10.3389/fnbeh.2014.00001
- 9 Schafe, G. E., Doyère, V., & LeDoux, J. E. (2005). Tracking the Fear Engram: The Lateral  
10 Amygdala Is an Essential Locus of Fear Memory Storage. *The Journal of Neuroscience*,  
11 25(43), 10010. doi:10.1523/JNEUROSCI.3307-05.2005
- 12 Szapiro, G., Vianna, M. R., McGaugh, J. L., Medina, J. H., & Izquierdo, I. (2003). The role of  
13 NMDA glutamate receptors, PKA, MAPK, and CAMKII in the hippocampus in  
14 extinction of conditioned fear. *Hippocampus*, 13(1), 53-58. doi:10.1002/hipo.10043
- 15 Talukdar, G., Inoue, R., Yoshida, T., & Mori, H. (2018). Impairment in extinction of cued fear  
16 memory in syntenin-1 knockout mice. *Neurobiol Learn Mem*, 149, 58-67.  
17 doi:10.1016/j.nlm.2018.01.006
- 18 Tomita, S., Chen, L., Kawasaki, Y., Petralia, R. S., Wenthold, R. J., Nicoll, R. A., & Bredt, D. S.  
19 (2003). Functional studies and distribution define a family of transmembrane AMPA  
20 receptor regulatory proteins. *The Journal of cell biology*, 161(4), 805-816.  
21 doi:10.1083/jcb.200212116
- 22 Wang, H., Shimizu, E., Tang, Y. P., Cho, M., Kyin, M., Zuo, W., . . . Tsien, J. Z. (2003).  
23 Inducible protein knockout reveals temporal requirement of CaMKII reactivation for  
24 memory consolidation in the brain. *Proc Natl Acad Sci U S A*, 100(7), 4287-4292.  
25 doi:10.1073/pnas.0636870100
- 26 Wei, F., Wang, G. D., Zhang, C., Shokat, K. M., Wang, H., Tsien, J. Z., . . . Zhuo, M. (2006).  
27 Forebrain overexpression of CaMKII abolishes cingulate long term depression and  
28 reduces mechanical allodynia and thermal hyperalgesia. *Mol Pain*, 2, 21.  
29 doi:10.1186/1744-8069-2-21
- 30 Winder, D. G., & Sweatt, J. D. (2001). Roles of serine/threonine phosphatases in hippocampal  
31 synaptic plasticity. *Nature Reviews Neuroscience*, 2, 461. doi:10.1038/35081514

- 1 Wu, X., Zhang, J.-T., Li, D., Zhou, J., Yang, J., Zheng, H.-L., . . . Wang, F. (2017). Aquaporin-4  
2 deficiency facilitates fear memory extinction in the hippocampus through excessive  
3 activation of extrasynaptic GluN2B-containing NMDA receptors. *Neuropharmacology*,  
4 *112*, 124-134. doi:<https://doi.org/10.1016/j.neuropharm.2016.06.031>
- 5 Yan, W. J., Tan, Y. C., Xu, J. C., Tang, X. P., Zhang, C., Zhang, P. B., & Ren, Z. Q. (2015).  
6 Protective Effects of Silibinin and Its Possible Mechanism of Action in Mice Exposed to  
7 Chronic Unpredictable Mild Stress. *Biomolecules & Therapeutics*, *23*(3), 245-250.  
8 doi:10.4062/biomolther.2014.138
- 9 Yehuda, R., Hoge, C. W., McFarlane, A. C., Vermetten, E., Lanius, R. A., Nievergelt, C. M., . . .  
10 Hyman, S. E. (2015). Post-traumatic stress disorder. *Nature Reviews Disease Primers*, *1*,  
11 15057. doi:10.1038/nrdp.2015.57
- 12 Yin, D. M., Chen, Y. J., Lu, Y. S., Bean, J. C., Sathyamurthy, A., Shen, C., . . . Mei, L. (2013).  
13 Reversal of behavioral deficits and synaptic dysfunction in mice overexpressing  
14 neuregulin 1. *Neuron*, *78*(4), 644-657. doi:10.1016/j.neuron.2013.03.028

15

16



**A1** The underwater-trauma procedure

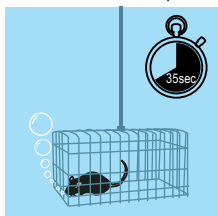

**A2**

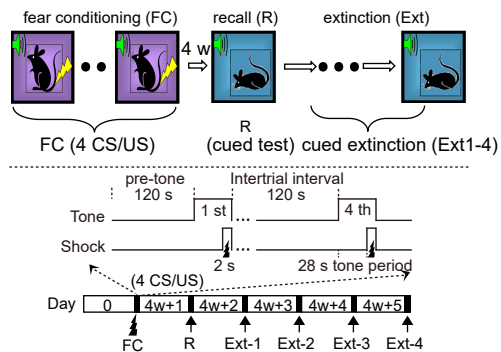

**B** fear extinction

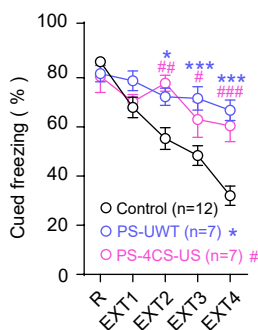

**C** open field

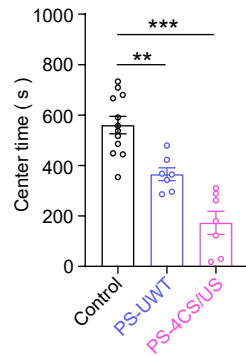

**D** light/dark test

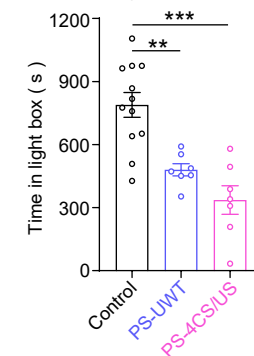

**E** O - maze

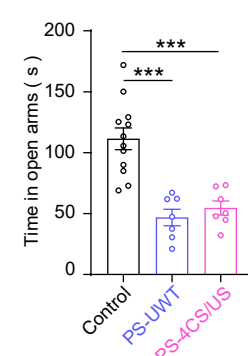

**F<sub>1</sub>**

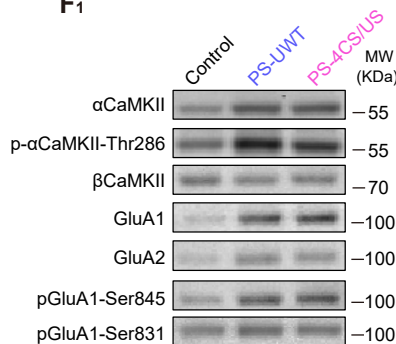

**F<sub>2</sub>**

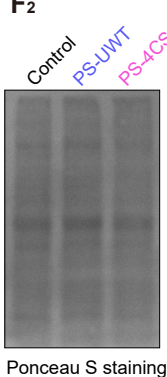

**G**

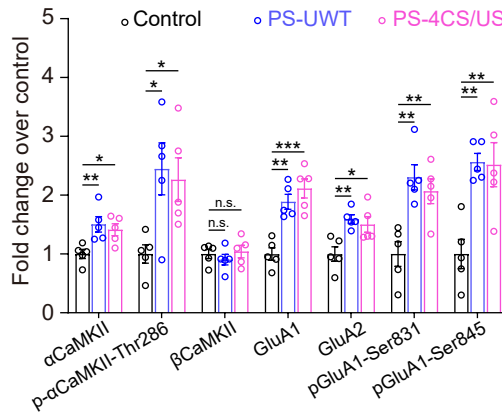

Figure 1

1 **FIGURE LEGENDS:**

2

3 **Figure 1. PTSD susceptible mice with cued fear extinction deficit and anxiety-like**  
4 **behaviors exhibited significant up-regulation of  $\alpha$ CaMKII and down-regulation of AMPAR**  
5 **internalization in LA.**

6 (A<sub>1-2</sub>) Schematic illustration for identifying PTSD susceptible mice following UWT (A<sub>1</sub>, PS-  
7 UWT) or 4-CS/US pairings (A<sub>2</sub>, PS-4CS/US) exposure. (B-E) PTSD susceptible mice exhibited  
8 the higher level of freezing responses in the fear extinction (B), and anxiety-like behaviors in  
9 OF(C), DL(D), OM(E) tests. PTSD susceptible mice spent significantly more time freezing  
10 during extinction (B, two-way ANOVA followed by multiple comparisons with Bonferroni's  
11 correction), less time in center area of OF chamber, in the light box of DL test and in the open  
12 arms of OM tests (C-E, one-way ANOVA followed by multiple comparisons with Bonferroni's  
13 correction) compared to control mice (control, n = 12; PS-UWT, n = 7; PS-4CS/US, n = 7). (F<sub>1</sub>)  
14 Representative blottings of LA synaptosomal region illustrating significant higher expression in  
15  $\alpha$ CaMKII, p- $\alpha$ CaMKII-Thr286, GluA1/2, GluA1-Ser831 /Ser845 phosphorylation in PTSD  
16 susceptible mice following stress exposure, but no significant change in  $\beta$ CaMKII expression.  
17 (F<sub>2</sub>) Ponceau S staining was used as a loading control. (G) Quantifications were based on the  
18 average of independent experiment (n = 5 per group). Western blotting in "Control", "PS-UWT"  
19 or "PS-4CS/US" groups was performed after fear extinction and all the anxiety-like behavior  
20 tests. One-way ANOVA followed by multiple comparisons with Bonferroni's correction. n.s.:  
21 not significant, \* P < 0.05, \*\* P < 0.01, \*\*\* P < 0.001. Error bars represent s.e.m.

22

23

24

25

26

27

28

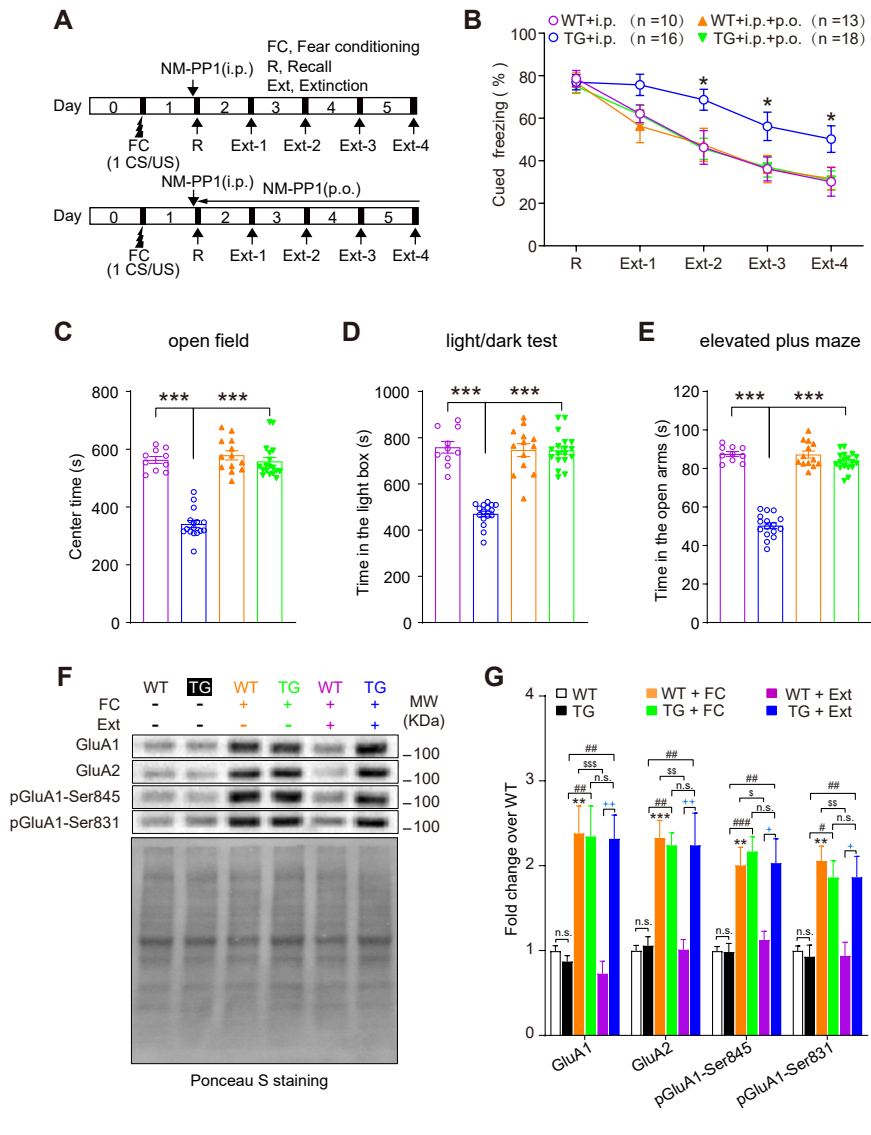

Figure 2

1 **Figure 2.  $\alpha$ CaMKII-F89G TG mice exhibited PTSD-like behaviors and impairments in**  
2 **AMPA internalization.**

3 (A) The schematic of behavioral procedure for cued fear conditioning and extinction trials.

4 (B) Impaired cued fear extinction in TG mice ( two-way ANOVA followed by multiple  
5 comparisons with Bonferroni's correction). Intraperitoneal (i.p.) injection and oral (p.o.)  
6 administration with NM-PP1 could rescue the cued extinction deficits of TG mice ( two-way  
7 ANOVA followed by multiple comparisons with Bonferroni's correction). (C-E) The higher  
8 level of anxiety-like behaviors in TG mice in the OF(C), DL(D) and EPM(E) tests after cued fear  
9 conditioning and extinction (one-way ANOVA followed by multiple comparisons with  
10 Bonferroni's correction). (F) Up: Representative blottings of LA synaptosomal fractions  
11 illustrating an increase in GluA1/2, phosphorylation level of GluA1-Ser845/Ser831 in both WT  
12 and TG mice after cued fear conditioning. Down: Ponceau S staining was used as a loading  
13 control. A decrease in GluA1/2, phosphorylation level of GluA1-Ser845/Ser831 in WT mice, but  
14 not in TG mice after cued fear extinction (n = 5 per group). (G) Quantifications were based on  
15 the average of independent experiment. Western blotting in "WT/TG + FC" or "WT/TG + Ext"  
16 groups was performed after fear conditioning or fear extinction following with anxiety-like  
17 behavior tests, respectively (one-way ANOVA followed by Bonferroni's multiple comparisons  
18 test). n.s.: not significant, \* P < 0.05, \*\* P < 0.01 and \*\*\* P < 0.001 versus WT group; \$ P <  
19 0.05, \$\$ P < 0.01 and \$\$\$ P < 0.001 versus WT + FC group; # P < 0.05, ## P < 0.01 and ### P <  
20 0.001 versus TG group; + P < 0.05 and ++ P < 0.01. Error bars represent s.e.m.

21

22

23

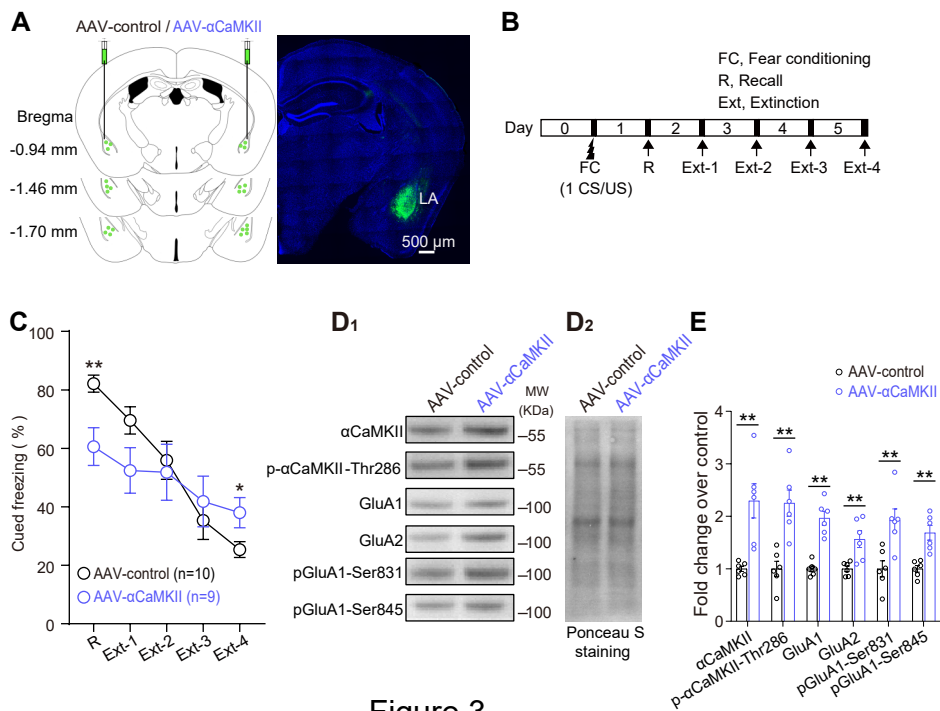

Figure 3

1 **Figure 3. Increasing  $\alpha$ CaMKII specifically in LA impaired the cued fear extinction and**  
2 **AMPA internalization in AAV- $\alpha$ CaMKII mice.**

3 (A) Images of coronal brain slice showing the expression of eGFP (green-colored) 6 weeks after  
4 bilateral injections of pAAV-TRE- $\alpha$ CaMKII-P2A-EGFP-CMV-rTA virus into LA. Numbers  
5 indicate coordinates relative to bregma. Scale bar, 500  $\mu$ m. (B) The schematic of behavioral  
6 procedure for cued fear extinction trials. (C) Elevating  $\alpha$ CaMKII in LA could impair cued fear  
7 memory and fear extinction (two-way ANOVA followed by multiple comparisons with  
8 Bonferroni's correction). (D<sub>1</sub>) Representative blottings of LA synaptosomal fractions illustrating  
9 an increased expression of  $\alpha$ CaMKII, p- $\alpha$ CaMKII-Thr286, GluA1/2, phosphorylated GluA1-  
10 Ser845/Ser831 in LA of AAV- $\alpha$ CaMKII mice than that in AAV-control mice. (D<sub>2</sub>) Ponceau S  
11 staining was used as a loading control. (E) Quantifications were based on the average of  
12 independent experiment (n = 6 per group). Western blotting was performed after fear extinction  
13 and all the anxiety-like behavior tests. Statistical differences were evaluated with Student's t test.  
14 \* P < 0.05, \*\* P < 0.01, \*\*\* P < 0.001 Error bars represent s.e.m.

15

16

17

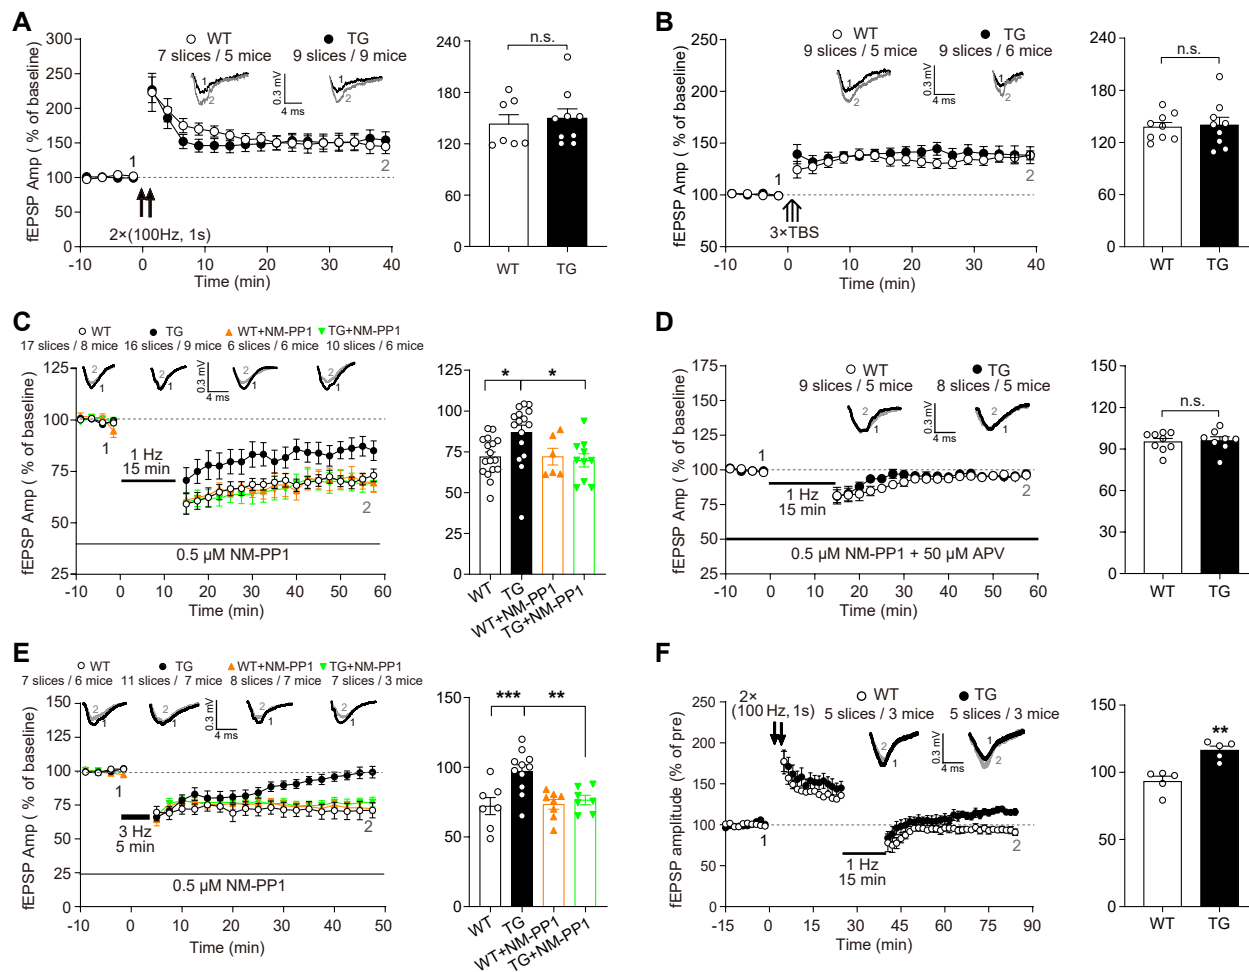

Figure 4



1 **Figure 4. Increasing  $\alpha$ CaMKII impairs NMDAR-dependent LTD at T-LA synapses of**  
2  **$\alpha$ CaMKII-F89G TG mice and NM-PP1 can rescue the impairments.**

3 **(A)** Similar LTP induced by high frequency stimulations (2 trains of 100 Hz stimulation for 1 s,  
4 10 s interval) in TG slices and WT slices. In this and the subsequent figures, insets show sample  
5 traces taken at baseline (1) and the last 10 min recording (2). **(B)** Normal LTP induced by three  
6 trains of theta burst stimulations (TBS, each train consisted of 10 bursts delivered at 5 Hz, each  
7 burst consisted of 4 pulses at 100 Hz) in TG slices. **(C)** Significantly weaker LTD induced in TG  
8 slices than that in WT slice after 1 Hz (15 min) stimulation. NM-PP1 (0.5  $\mu$ M) recovered the  
9 reduced LTD in TG slice to normal level. **(D)** LTD was abolished in WT and TG slices exposed  
10 to both NM-PP1 (0.5  $\mu$ M) and APV (50  $\mu$ M). The solid line shows the duration of both NM-PP1  
11 and APV application. **(E)** Strong LTD could be induced by 3 Hz (5 min) stimulation in WT  
12 slices but not in TG slices, NM-PP1 (0.5  $\mu$ M) rescued the impaired LTD in TG slice. **(F)**  
13 Impaired depotentiation can be observed in TG slices. All of the bar graph summarizing data  
14 obtained during last 10 min recording. Statistical differences were evaluated with Student's t test  
15 (A, B, D and F) and one-way ANOVA followed by Bonferroni's multiple comparisons test (C  
16 and E). n.s.: not significant, \*  $P < 0.05$ , \*\*  $P < 0.01$ , \*\*\*  $P < 0.001$ . All values are mean  $\pm$  s.e.m.

17

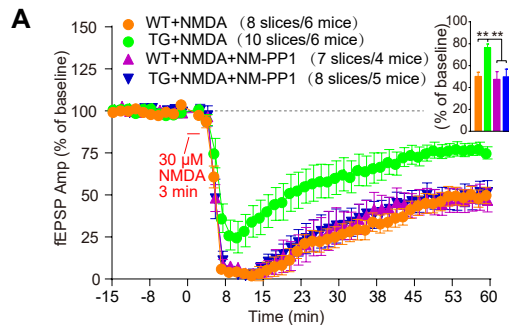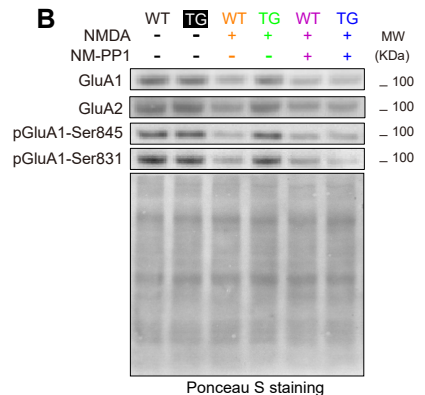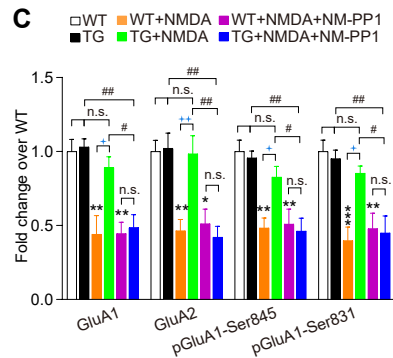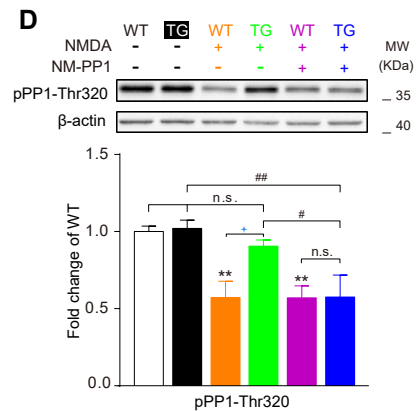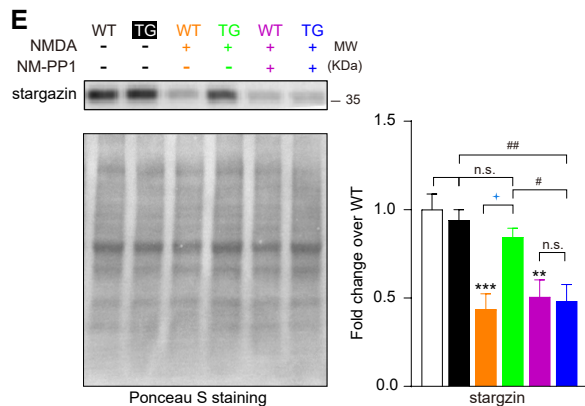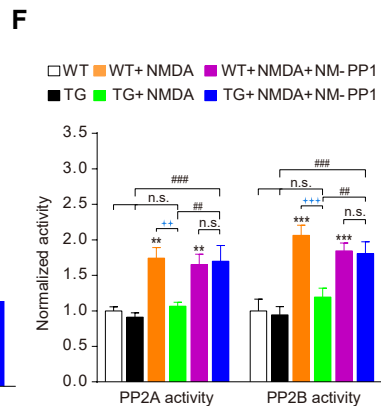

1 **Figure 5. Increasing  $\alpha$ CaMKII impairs AMPAR internalization / dephosphorylation,**  
2 **reduces protein phosphatase (PP) activity, and increases stargazin expression during**  
3 **NMDAR-dependent LTD and NM-PP1 can rescue all impairments.**

4 **(A)** Attenuated chem-LTD induced by 30  $\mu$ M NMDA for 3 min in TG slices. This deficit could  
5 be rescued by 0.5  $\mu$ M NM-PP1. Right-up panel: bar graph summarizing data obtained during  
6 last 10 min recording in the different groups depicted. The following Western blotting was  
7 performed 1 hour later after NMDA application. **(B)** Representative blottings of LA  
8 synaptosomal fractions illustrating a reduction in GluA1/2, phosphorylation level of GluA1-  
9 Ser845/831 in WT slices after NMDA treatment but not in TG slices. NM-PP1 could rescue  
10 these deficits in TG slices. Down: Ponceau S staining was used as a loading control. **(C)**  
11 Quantifications were based on the average of independent experiments (n = 5 per group). **(D)**  
12 Up: Representative blottings of LA synaptosomal fractions illustrating a reduction in  
13 phosphorylation level of pPP1-Thr320, indicating an increase in PP1 activity in WT mice  
14 after NMDA treatment but not in TG. NM-PP1 rescued such deficit in TG mice. Down:  
15 Quantifications were based on the average of independent experiments (n = 4 per group). **(E)**  
16 A remarkably higher level of stargazin in amygdala synaptosomal fractions in TG slices than  
17 that in WT slices after NMDA application, NM-PP1 rescued the deficit in TG mice (n = 5  
18 per group). Down: Ponceau S staining was used as a loading control. **(F)** An increased  
19 activity of PP2A and PP2B in WT slices were exhibited after NMDA application but not in  
20 TG slices, and NM-PP1 rescued these deficits in TG mice (n = 4 per group). Statistical  
21 differences were evaluated with one-way ANOVA followed by multiple comparisons with  
22 Bonferroni's correction. n.s.: not significant, \* P < 0.05, \*\* P < 0.01 and \*\*\* P < 0.001  
23 versus WT group; # P < 0.05, ## P < 0.01 and ### P < 0.001 versus TG group; + P < 0.05,  
24 ++ P < 0.01 and +++ P < 0.001. Error bars represent s.e.m.

25

26

27

28

1 *Supplemental information*

2 **Higher level of  $\alpha$ CaMKII but normal morphology in LA of  $\alpha$ CaMKII-F89G TG mice**

3 First, we examined the  $\alpha$ CaMKII expression level in LA of both  $\alpha$ CaMKII-F89G TG and  
4 WT mice. Western blotting quantification revealed the expression of synaptic  $\alpha$ CaMKII protein  
5 in LA of TG mice was 136% of WT littermates (Supplementary Fig. S1A, 1B,  $P < 0.05$ ).  
6 Strikingly, the p- $\alpha$ CaMKII-Thr286 in LA of TG mice was 195% of WT littermates ( $P < 0.001$ ).  
7 However, no obvious change in  $\beta$ CaMKII expression was observed in LA of TG mice  
8 (Supplementary Fig. S1A, B). Moreover, Nissl staining showed no detectable morphological  
9 abnormalities in LA of TG mice (Supplementary Fig. S1C). Normal shapes and architecture of  
10 dendritic spines could also be found in LA of TG mice (Supplementary Fig. S1D, S1E). These  
11 results suggest that the transgenic expression of  $\alpha$ CaMKII-F89G increase  $\alpha$ CaMKII expression  
12 in LA.

13 **Normal locomotor activity and acute pain threshold to footshock in  $\alpha$ CaMKII-F89G TG**  
14 **Mice.**

15 Then, to investigate whether  $\alpha$ CaMKII overexpression influences basal motor, exploratory  
16 behaviors and the foot shock sensitivity, we performed open field and pain threshold tests. No  
17 significant difference was observed between TG and WT mice in both locomotor activity (Fig.  
18 S2A,  $P > 0.05$ ; Student's t-test) and rearing behavior (Fig. S2A,  $P > 0.05$ ), showing that TG mice  
19 exhibit normal locomotor activity and exploratory behavior. Moreover, we quantified the  
20 minimum current intensity of foot shock required to induce flinching, vocalizing and jumping in  
21 two groups of mice. There was also no significant difference in the threshold of current intensity  
22 to trigger flinching, vocalizing and jumping behaviors in TG mice and WT littermates (Fig. S2 B,  
23  $P > 0.05$ ). Taken all together, we can conclude that  $\alpha$ CaMKII overexpression indeed impairs  
24 cued fear extinction.

25

26

27

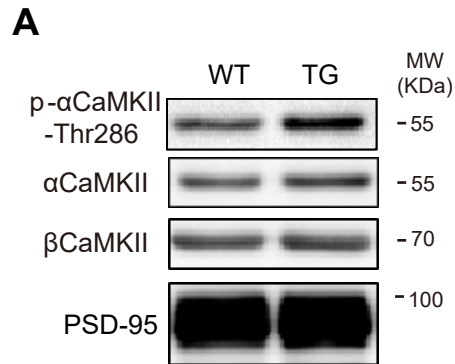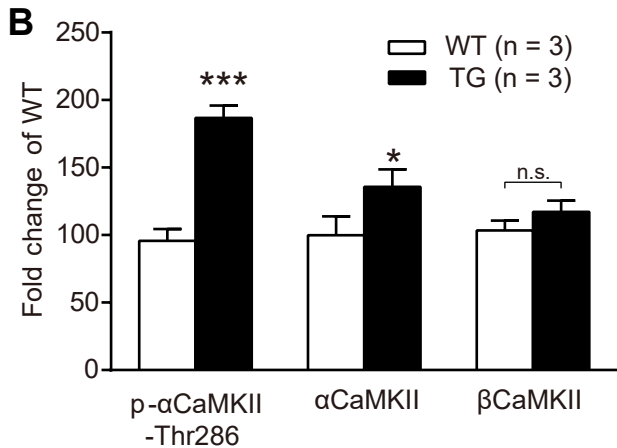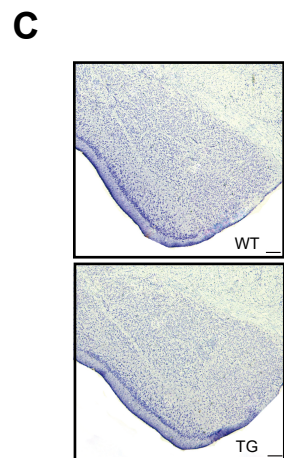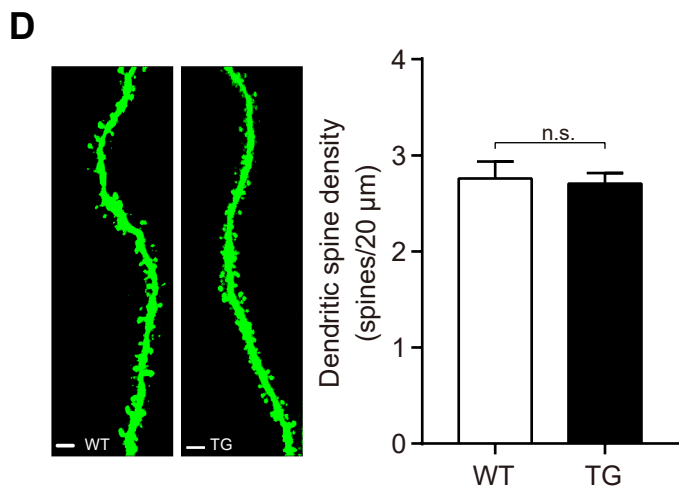

1 **Fig S1. Higher level of  $\alpha$ CaMKII but normal morphology in LA of  $\alpha$ CaMKII-F89G TG**  
2 **mice.**

3 **(A)** Immunoblottings of  $\alpha$ CaMKII protein in LA from WT and TG mice (p- $\alpha$ CaMKII-Thr286: p  
4 < 0.001;  $\alpha$ CaMKII: p < 0.05;  $\beta$ CaMKII: p > 0.05). **(B)** Densitometric analysis shows a  
5 significantly higher expression of  $\alpha$ CaMKII and p- $\alpha$ CaMKII-Thr286 in TG than that in WT mice.

6 **(C)** Parts of Nissl stained coronal slices showing the amygdala of both WT and TG mice. Note  
7 no detectable morphological differences between WT and TG mice in the amygdala. Scale bars,  
8 100  $\mu$ m. **(D)** Dendritic spine of LA pyramidal neurons in WT and TG mice. Scale bar, 5  $\mu$ m.

9 The spine density (spines / 20  $\mu$ m) was comparable between WT and TG mice ( p > 0.05).

10 Statistical differences were evaluated with Student's t test, \* P < 0.05, \*\* P < 0.01, \*\*\* P < 0.001.

11 All data are shown as mean  $\pm$  s.e.m.

12

13

14

15

16

17

18

19

20

21

22

23

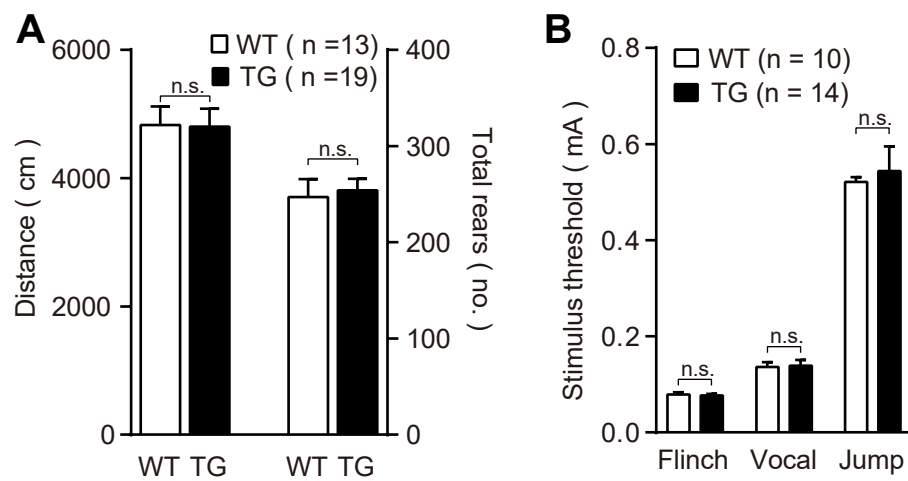

Fig S2



1 **Fig S2. Normal locomotor activity and acute pain threshold to footshock in  $\alpha$ CaMKII-**  
2 **F89G TG Mice.**

3 **(A)** Similar moving distance ( $P > 0.05$ ) and rearing behavior ( $P > 0.05$ ) in TG and WT mice  
4 during a 15 min of the open field test. **(B)** Normal pain sensitivity to an increasing electric  
5 footshock in TG mice ( $P > 0.05$ ). All values are mean  $\pm$  s.e.m. Statistical differences were  
6 evaluated with Student's t-test.

7

8

9

10

11

12

13

14

15

16

17

18

19

20

21

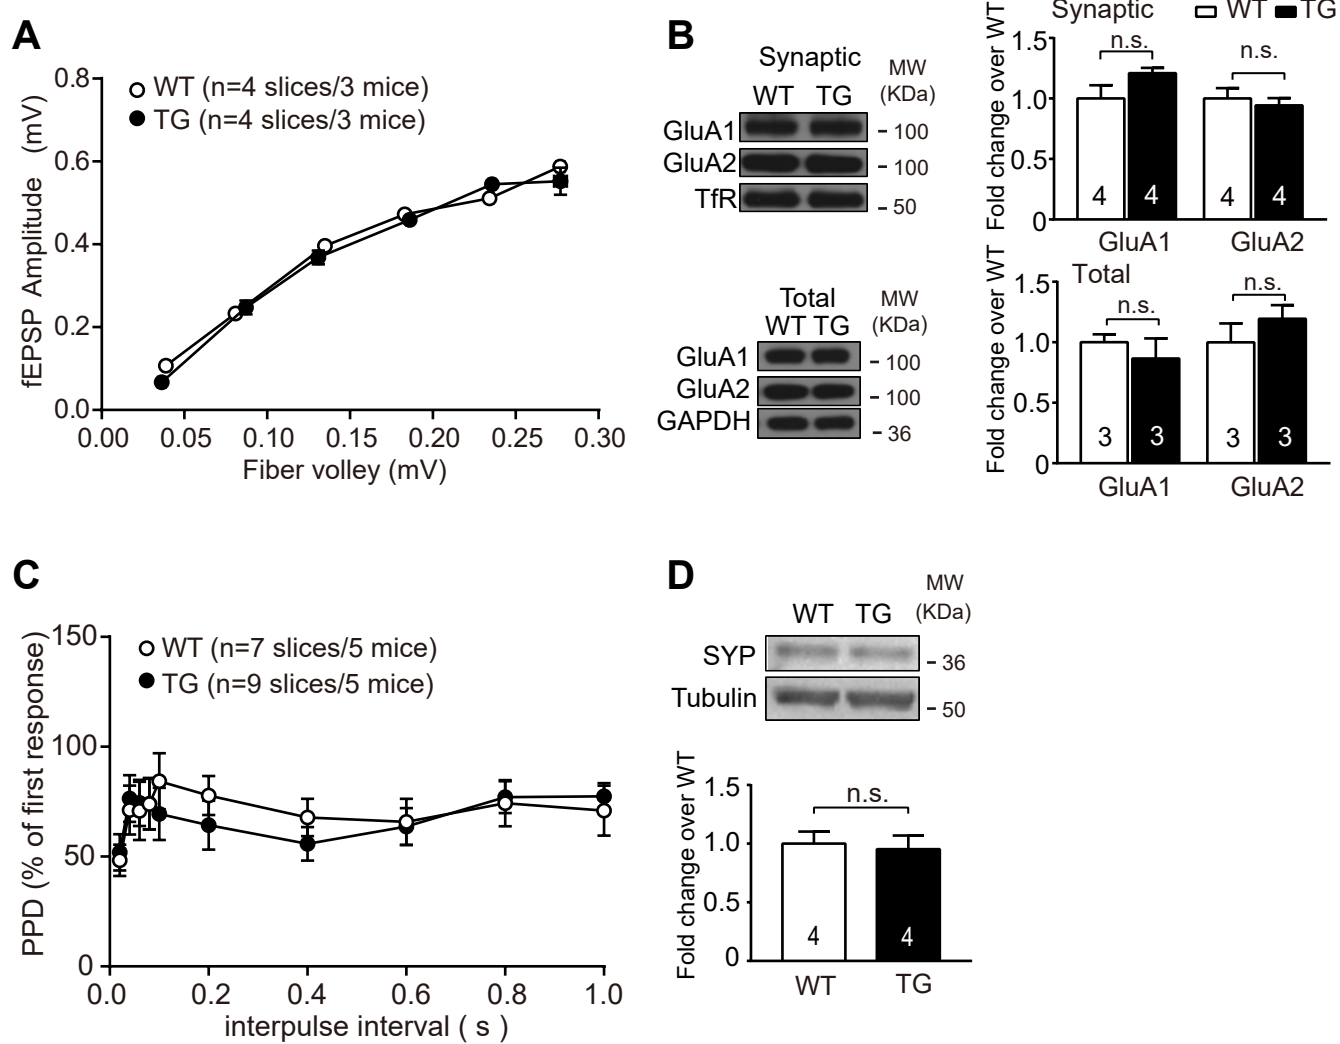

Fig S3

1 **Fig S3. Normal basal synaptic transmission at T-LA synapses in  $\alpha$ CaMKII-F89G TG mice.**

2 **(A)** No significant difference in the input/output curve at T-LA synapses between WT and TG  
3 slices (two-way ANOVA followed by multiple comparisons with Bonferroni's correction). **(B)**  
4 Comparable synaptic or total GluA1/2 expression in LA of WT and TG slices (Statistical  
5 differences were evaluated with Student's t-test). **(C)** Similar paired-pulse depression at different  
6 interpulse intervals in WT and TG amygdala slices (two-way ANOVA followed by multiple  
7 comparisons with Bonferroni's correction). **(D)** Comparable expression levels of synapsin in LA  
8 of WT and TG amygdala slices (Statistical differences were evaluated with Student's t-test). All  
9 data are shown as mean  $\pm$  s.e.m.

10

11

12

13

14

15
